# Supplementary material for: Functional genomics reveals strain-specific genetic requirements conferring hypoxic growth in Mycobacterium intracellulare
Source: bioRxiv preprint, doi:10.1101/2024.05.12.593797, version 4 (2025-11-19)
Supplement: Supplementary Table 3 [file 593797_file05.xlsx]

## Sheet: HMM
	ATCC13950	Mi27	Mi198	M018	MOTT64	M001	M003	M019	M021
Essential (ES)	484	283	353	86	174	228	133	271	153
Growth-defect (GD)	68	197	75	107	89	113	111	35	53
Non-essential (NE)	4452	4955	4743	5156	5003	5105	4982	5086	4952
Growth-advantage (GA)	57	244	91	9	19	59	8	16	38
