# Supplementary material for: Functional genomics reveals strain-specific genetic requirements conferring hypoxic growth in Mycobacterium intracellulare
Source: bioRxiv preprint, doi:10.1101/2024.05.12.593797, version 4 (2025-11-19)
Supplement: Supplementary Table 5 [file 593797_file07.xlsx]

## Sheet: strain-dependent (ES or GD)
Locus_tag	Product	Number of hit strains	Shared with hypoxic pellicle formation in ATCC13950	ATCC13950	M.i.198	M.i.27	M018	M003	M019	M021	M001	MOTT64
OCU_RS25000	chromosomal replication initiator protein DnaA	8	No	Hit	Hit	Hit	No hit	Hit	Hit	Hit	Hit	Hit
OCU_RS25010	DNA replication/repair protein RecF	4	No	No hit	Hit	No hit	Hit	Hit	Hit	No hit	No hit	No hit
OCU_RS25015	DUF721 family protein	1	No	No hit	No hit	No hit	Hit	No hit	No hit	No hit	No hit	No hit
OCU_RS25185	XRE family transcriptional regulator	1	No	No hit	No hit	Hit	No hit	No hit	No hit	No hit	No hit	No hit
OCU_RS25325	inositol-3-phosphate synthase	6	No	Hit	Hit	Hit	No hit	No hit	Hit	No hit	Hit	Hit
OCU_RS25340	hypothetical protein	2	No	Hit	No hit	No hit	No hit	No hit	No hit	No hit	Hit	No hit
OCU_RS25345	penicillin-binding protein	3	No	Hit	Hit	No hit	No hit	No hit	No hit	No hit	Hit	No hit
OCU_RS25570	hypothetical protein	1	No	No hit	No hit	Hit	No hit	No hit	No hit	No hit	No hit	No hit
OCU_RS25945	superoxide dismutase [Mn]	1	No	Hit	No hit	No hit	No hit	No hit	No hit	No hit	No hit	No hit
OCU_RS25970	prephenate dehydratase	1	No	No hit	No hit	No hit	Hit	No hit	No hit	No hit	No hit	No hit
OCU_RS25995	serine--tRNA ligase	5	No	Hit	Hit	Hit	No hit	No hit	Hit	No hit	Hit	No hit
OCU_RS26030	MBL fold metallo-hydrolase	2	No	Hit	No hit	No hit	No hit	No hit	No hit	No hit	Hit	No hit
OCU_RS26060	cell surface protein	1	No	No hit	No hit	No hit	No hit	No hit	No hit	No hit	Hit	No hit
OCU_RS26075	phosphatase PAP2 family protein	2	No	No hit	No hit	No hit	No hit	Hit	No hit	No hit	Hit	No hit
OCU_RS26085	hypothetical protein	4	No	Hit	Hit	No hit	Hit	No hit	No hit	No hit	Hit	No hit
OCU_RS26090	esterase family protein	1	No	No hit	No hit	No hit	No hit	No hit	No hit	No hit	Hit	No hit
OCU_RS26115	acyl-CoA carboxylase subunit beta	6	No	Hit	Hit	Hit	No hit	No hit	Hit	No hit	Hit	Hit
OCU_RS26235	cysteine desulfurase-like protein	2	No	Hit	No hit	No hit	No hit	No hit	No hit	No hit	Hit	No hit
OCU_RS26325	HAMP domain-containing histidine kinase	5	No	No hit	No hit	Hit	No hit	No hit	Hit	Hit	Hit	Hit
OCU_RS26340	NADPH:quinone oxidoreductase family protein	1	No	No hit	No hit	No hit	No hit	Hit	No hit	No hit	No hit	No hit
OCU_RS26345	TetR/AcrR family transcriptional regulator	1	No	No hit	No hit	No hit	No hit	Hit	No hit	No hit	No hit	No hit
OCU_RS26490	CoA ester lyase	1	No	No hit	No hit	No hit	Hit	No hit	No hit	No hit	No hit	No hit
OCU_RS26720	glutamine amidotransferase	7	No	Hit	Hit	Hit	No hit	No hit	Hit	Hit	Hit	Hit
OCU_RS26725	Mur ligase family protein	7	No	Hit	Hit	Hit	No hit	No hit	Hit	Hit	Hit	Hit
OCU_RS26735	2-isopropylmalate synthase	7	No	Hit	Hit	Hit	No hit	Hit	No hit	Hit	Hit	Hit
OCU_RS26740	aspartate kinase	5	No	Hit	Hit	Hit	No hit	Hit	Hit	No hit	No hit	No hit
OCU_RS26970	ArsA family ATPase	1	No	No hit	Hit	No hit	No hit	No hit	No hit	No hit	No hit	No hit
OCU_RS27010	acid resistance serine protease MarP	1	No	No hit	No hit	No hit	No hit	No hit	No hit	No hit	Hit	No hit
OCU_RS27015	alpha/beta hydrolase	6	No	No hit	Hit	No hit	No hit	Hit	Hit	Hit	Hit	Hit
OCU_RS27060	ABC transporter ATP-binding protein	1	No	No hit	No hit	Hit	No hit	No hit	No hit	No hit	No hit	No hit
OCU_RS27180	inorganic diphosphatase	2	No	No hit	No hit	Hit	No hit	No hit	Hit	No hit	No hit	No hit
OCU_RS27195	tRNA lysidine(34) synthetase TilS	1	No	No hit	No hit	No hit	No hit	No hit	Hit	No hit	No hit	No hit
OCU_RS27200	hypoxanthine phosphoribosyltransferase	1	No	No hit	No hit	No hit	No hit	No hit	Hit	No hit	No hit	No hit
OCU_RS27260	GTP cyclohydrolase I FolE	8	No	Hit	Hit	Hit	Hit	No hit	Hit	Hit	Hit	Hit
OCU_RS27265	dihydropteroate synthase	8	No	Hit	Hit	Hit	Hit	No hit	Hit	Hit	Hit	Hit
OCU_RS27270	dihydroneopterin aldolase	7	No	Hit	Hit	Hit	Hit	No hit	Hit	No hit	Hit	Hit
OCU_RS27295	pantoate--beta-alanine ligase	4	No	Hit	No hit	No hit	No hit	Hit	Hit	No hit	Hit	No hit
OCU_RS27300	aspartate 1-decarboxylase	4	No	Hit	No hit	No hit	No hit	Hit	Hit	No hit	Hit	No hit
OCU_RS27320	ATP-dependent Clp protease ATP-binding subunit	8	No	Hit	Hit	Hit	Hit	Hit	Hit	No hit	Hit	Hit
OCU_RS27325	hypothetical protein	6	No	Hit	Hit	No hit	Hit	Hit	Hit	No hit	Hit	No hit
OCU_RS27370	RNA polymerase-binding transcription factor CarD	6	No	Hit	Hit	Hit	Hit	No hit	No hit	No hit	Hit	Hit
OCU_RS27380	2-C-methyl-D-erythritol 2,4-cyclodiphosphate synthase	7	No	Hit	Hit	Hit	Hit	No hit	No hit	Hit	Hit	Hit
OCU_RS27410	LamB/YcsF family protein	1	No	No hit	No hit	Hit	No hit	No hit	No hit	No hit	No hit	No hit
OCU_RS27495	pyridoxal phosphate-dependent aminotransferase	1	No	No hit	No hit	No hit	Hit	No hit	No hit	No hit	No hit	No hit
OCU_RS27500	acyl-CoA dehydrogenase	1	No	No hit	No hit	No hit	Hit	No hit	No hit	No hit	No hit	No hit
OCU_RS27505	acyl-CoA dehydrogenase	1	No	No hit	No hit	No hit	Hit	No hit	No hit	No hit	No hit	No hit
OCU_RS27510	acyl-CoA dehydrogenase	1	No	No hit	No hit	No hit	Hit	No hit	No hit	No hit	No hit	No hit
OCU_RS27535	acetyl-CoA C-acetyltransferase	1	No	No hit	No hit	No hit	Hit	No hit	No hit	No hit	No hit	No hit
OCU_RS27555	CoA-transferase	1	No	No hit	No hit	No hit	Hit	No hit	No hit	No hit	No hit	No hit
OCU_RS27560	CoA transferase subunit A	1	No	No hit	No hit	No hit	Hit	No hit	No hit	No hit	No hit	No hit
OCU_RS27580	nitroreductase family deazaflavin-dependent oxidoreductase	1	No	No hit	No hit	No hit	No hit	Hit	No hit	No hit	No hit	No hit
OCU_RS27620	3-oxo-23,24-bisnorchol-4,17(20)-dien-22-oyl-CoA hydratase subunit beta	1	No	No hit	No hit	No hit	Hit	No hit	No hit	No hit	No hit	No hit
OCU_RS27850	enoyl-CoA hydratase	1	No	No hit	No hit	No hit	No hit	No hit	No hit	No hit	No hit	Hit
OCU_RS28020	phosphoribosylamine--glycine ligase	8	No	No hit	Hit	Hit	Hit	Hit	Hit	Hit	Hit	Hit
OCU_RS28045	adenylosuccinate lyase	8	No	Hit	Hit	Hit	No hit	Hit	Hit	Hit	Hit	Hit
OCU_RS28065	phosphoribosylaminoimidazolesuccinocarboxamide synthase	8	No	Hit	Hit	Hit	No hit	Hit	Hit	Hit	Hit	Hit
OCU_RS28105	phosphoribosylformylglycinamidine synthase subunit PurS	8	No	Hit	Hit	Hit	Hit	No hit	Hit	Hit	Hit	Hit
OCU_RS28110	phosphoribosylformylglycinamidine synthase subunit PurQ	8	No	Hit	Hit	Hit	Hit	No hit	Hit	Hit	Hit	Hit
OCU_RS28240	phosphoribosylformylglycinamidine cyclo-ligase	7	No	Hit	Hit	Hit	Hit	No hit	Hit	Hit	Hit	No hit
OCU_RS28290	DUF2993 domain-containing protein	1	No	No hit	Hit	No hit	No hit	No hit	No hit	No hit	No hit	No hit
OCU_RS28340	acyl-ACP desaturase	7	No	Hit	Hit	Hit	No hit	Hit	No hit	Hit	Hit	Hit
OCU_RS28515	CoA transferase	3	No	No hit	No hit	Hit	Hit	Hit	No hit	No hit	No hit	No hit
OCU_RS28520	hypothetical protein	1	No	No hit	Hit	No hit	No hit	No hit	No hit	No hit	No hit	No hit
OCU_RS28525	nuclear transport factor 2 family protein	1	No	No hit	Hit	No hit	No hit	No hit	No hit	No hit	No hit	No hit
OCU_RS28645	cyclase family protein	1	No	No hit	Hit	No hit	No hit	No hit	No hit	No hit	No hit	No hit
OCU_RS28735	CoA transferase	1	No	No hit	No hit	No hit	No hit	No hit	No hit	No hit	Hit	No hit
OCU_RS28740	SDR family oxidoreductase	1	Yes	No hit	No hit	No hit	No hit	No hit	No hit	No hit	Hit	No hit
OCU_RS28895	LLM class F420-dependent oxidoreductase	1	No	No hit	Hit	No hit	No hit	No hit	No hit	No hit	No hit	No hit
OCU_RS29380	phosphoserine transaminase	3	No	No hit	No hit	Hit	No hit	No hit	Hit	No hit	No hit	Hit
OCU_RS29460	cation-translocating P-type ATPase	1	No	No hit	Hit	No hit	No hit	No hit	No hit	No hit	No hit	No hit
OCU_RS29580	ATP-dependent DNA ligase	1	No	No hit	No hit	No hit	Hit	No hit	No hit	No hit	No hit	No hit
OCU_RS29630	SDR family oxidoreductase	1	No	No hit	No hit	No hit	Hit	No hit	No hit	No hit	No hit	No hit
OCU_RS29635	glucose-6-phosphate isomerase	4	No	No hit	Hit	No hit	Hit	No hit	Hit	No hit	Hit	No hit
OCU_RS29640	chorismate mutase	1	No	No hit	No hit	No hit	No hit	No hit	No hit	No hit	Hit	No hit
OCU_RS29645	DNA helicase PcrA	1	No	No hit	No hit	No hit	No hit	No hit	No hit	No hit	Hit	No hit
OCU_RS29660	ADP-forming succinate--CoA ligase subunit beta	1	No	Hit	No hit	No hit	No hit	No hit	No hit	No hit	No hit	No hit
OCU_RS29765	HAMP domain-containing histidine kinase	5	No	Hit	Hit	Hit	No hit	No hit	Hit	No hit	Hit	No hit
OCU_RS29770	PDZ domain-containing protein	1	No	No hit	No hit	No hit	No hit	No hit	No hit	No hit	Hit	No hit
OCU_RS29800	UTP--glucose-1-phosphate uridylyltransferase	2	No	No hit	No hit	Hit	No hit	No hit	Hit	No hit	No hit	No hit
OCU_RS29915	16S rRNA (cytidine(1402)-2'-O)-methyltransferase	2	No	No hit	No hit	No hit	Hit	No hit	No hit	Hit	No hit	No hit
OCU_RS29920	aminodeoxychorismate synthase component I	4	Yes	No hit	No hit	No hit	Hit	No hit	Hit	Hit	No hit	Hit
OCU_RS30050	TetR/AcrR family transcriptional regulator	1	No	No hit	No hit	Hit	No hit	No hit	No hit	No hit	No hit	No hit
OCU_RS30065	methionine--tRNA ligase	8	No	Hit	Hit	Hit	No hit	Hit	Hit	Hit	Hit	Hit
OCU_RS30095	aminoacyl-tRNA hydrolase	3	No	Hit	No hit	Hit	No hit	No hit	No hit	No hit	Hit	No hit
OCU_RS30100	50S ribosomal protein L25/general stress proteinCtc	2	No	Hit	No hit	No hit	No hit	No hit	No hit	No hit	Hit	No hit
OCU_RS30120	hypothetical protein	1	Yes	No hit	No hit	No hit	No hit	Hit	No hit	No hit	No hit	No hit
OCU_RS30125	arsenate reductase (glutaredoxin)	1	No	No hit	No hit	No hit	No hit	Hit	No hit	No hit	No hit	No hit
OCU_RS30135	bifunctional UDP-N-acetylglucosamine diphosphorylase/glucosamine-1-phosphate N-acetyltransferase GlmU	6	No	Hit	Hit	Hit	No hit	No hit	Hit	No hit	Hit	Hit
OCU_RS30225	HAMP domain-containing histidine kinase	1	No	No hit	No hit	No hit	No hit	No hit	No hit	No hit	Hit	No hit
OCU_RS30490	isoprenyl transferase	2	No	Hit	Hit	No hit	No hit	No hit	No hit	No hit	No hit	No hit
OCU_RS30500	type I pantothenate kinase	5	No	Hit	Hit	Hit	No hit	No hit	Hit	No hit	Hit	No hit
OCU_RS30510	acyl-ACP desaturase	8	No	Hit	Hit	Hit	Hit	Hit	Hit	No hit	Hit	Hit
OCU_RS30530	hypothetical protein	6	No	No hit	Hit	No hit	Hit	Hit	Hit	Hit	Hit	No hit
OCU_RS30535	class II fumarate hydratase	1	No	No hit	Hit	No hit	No hit	No hit	No hit	No hit	No hit	No hit
OCU_RS30540	class II fructose-bisphosphatase	2	Yes	No hit	No hit	No hit	No hit	No hit	Hit	No hit	Hit	No hit
OCU_RS30575	exodeoxyribonuclease VII small subunit	3	No	No hit	Hit	No hit	No hit	No hit	Hit	No hit	Hit	No hit
OCU_RS30685	DUF1298 domain-containing protein	1	No	No hit	No hit	No hit	No hit	No hit	No hit	No hit	No hit	Hit
OCU_RS30725	5-methyltetrahydropteroyltriglutamate-- homocysteine S-methyltransferase	2	No	No hit	No hit	No hit	No hit	Hit	Hit	No hit	No hit	No hit
OCU_RS31010	PPE family protein	1	No	No hit	No hit	No hit	Hit	No hit	No hit	No hit	No hit	No hit
OCU_RS31030	hypothetical protein	1	No	No hit	No hit	No hit	No hit	No hit	Hit	No hit	No hit	No hit
OCU_RS31060	proline dehydrogenase	1	No	No hit	No hit	No hit	No hit	No hit	No hit	No hit	Hit	No hit
OCU_RS31145	ATPase AAA	2	No	No hit	No hit	No hit	No hit	Hit	No hit	Hit	No hit	No hit
OCU_RS31235	MRP family ATP-binding protein	2	No	No hit	No hit	Hit	No hit	No hit	Hit	No hit	No hit	No hit
OCU_RS31350	acyltransferase	6	No	Hit	Hit	No hit	Hit	Hit	No hit	No hit	Hit	Hit
OCU_RS32775	threonine synthase	8	No	Hit	Hit	No hit	Hit	Hit	Hit	Hit	Hit	Hit
OCU_RS32780	homoserine kinase	2	No	No hit	No hit	No hit	No hit	No hit	Hit	Hit	No hit	No hit
OCU_RS32785	transcription termination factor Rho	6	No	Hit	Hit	Hit	No hit	No hit	Hit	No hit	Hit	Hit
OCU_RS32795	peptide chain release factor 1	8	No	Hit	Hit	Hit	No hit	Hit	Hit	Hit	Hit	Hit
OCU_RS32800	peptide chain release factor N(5)-glutamine methyltransferase	2	No	No hit	Hit	No hit	No hit	No hit	No hit	No hit	Hit	No hit
OCU_RS32810	undecaprenyl/decaprenyl-phosphate alpha-N-acetylglucosaminyl 1-phosphate transferase	5	No	Hit	Hit	Hit	No hit	No hit	Hit	No hit	Hit	No hit
OCU_RS32825	F0F1 ATP synthase subunit C	6	No	No hit	Hit	No hit	Hit	No hit	Hit	Hit	Hit	Hit
OCU_RS32830	F0F1 ATP synthase subunit B	5	No	No hit	Hit	No hit	Hit	No hit	Hit	Hit	Hit	No hit
OCU_RS32835	F0F1 ATP synthase subunit B/delta	7	No	Hit	Hit	Hit	No hit	No hit	Hit	Hit	Hit	Hit
OCU_RS32855	F0F1 ATP synthase subunit epsilon	1	No	No hit	No hit	No hit	No hit	Hit	No hit	No hit	No hit	No hit
OCU_RS32870	UDP-N-acetylglucosamine 1-carboxyvinyltransferase	2	No	No hit	No hit	Hit	No hit	No hit	Hit	No hit	No hit	No hit
OCU_RS32955	1,4-alpha-glucan branching protein GlgB	5	No	Hit	Hit	Hit	Hit	No hit	No hit	No hit	Hit	No hit
OCU_RS33045	ATP-binding cassette domain-containing protein	3	No	No hit	No hit	Hit	Hit	No hit	Hit	No hit	No hit	No hit
OCU_RS33135	AMP-dependent ligase	1	No	No hit	No hit	No hit	No hit	No hit	No hit	No hit	Hit	No hit
OCU_RS33155	hypothetical protein	2	No	No hit	No hit	No hit	No hit	Hit	No hit	No hit	Hit	No hit
OCU_RS33160	enoyl-CoA hydratase/isomerase family protein	1	Yes	No hit	No hit	No hit	No hit	No hit	No hit	No hit	Hit	No hit
OCU_RS33170	SDR family oxidoreductase	1	No	No hit	No hit	No hit	No hit	No hit	No hit	No hit	Hit	No hit
OCU_RS33235	aldehyde dehydrogenase family protein	1	No	No hit	No hit	No hit	Hit	No hit	No hit	No hit	No hit	No hit
OCU_RS33245	SDR family NAD(P)-dependent oxidoreductase	1	No	No hit	No hit	No hit	Hit	No hit	No hit	No hit	No hit	No hit
OCU_RS33355	acyl-CoA dehydrogenase	2	Yes	No hit	No hit	Hit	No hit	No hit	No hit	No hit	Hit	No hit
OCU_RS33360	STAS domain-containing protein	1	No	No hit	No hit	No hit	No hit	No hit	No hit	No hit	Hit	No hit
OCU_RS33580	SDR family oxidoreductase	6	No	Hit	Hit	Hit	No hit	No hit	Hit	Hit	Hit	No hit
OCU_RS33585	MFS transporter	1	Yes	No hit	No hit	No hit	No hit	No hit	No hit	No hit	Hit	No hit
OCU_RS33590	membrane protein	1	No	No hit	No hit	No hit	No hit	No hit	No hit	No hit	Hit	No hit
OCU_RS33625	pyruvate dehydrogenase (acetyl-transferring) E1 component subunit alpha	2	Yes	No hit	No hit	No hit	No hit	No hit	Hit	No hit	Hit	No hit
OCU_RS33630	alpha-ketoacid dehydrogenase subunit beta	1	No	No hit	No hit	No hit	No hit	No hit	No hit	No hit	Hit	No hit
OCU_RS33635	2-oxo acid dehydrogenase subunit E2	2	No	No hit	No hit	No hit	No hit	No hit	Hit	No hit	Hit	No hit
OCU_RS33640	enoyl-CoA hydratase	2	No	No hit	No hit	No hit	No hit	No hit	Hit	No hit	Hit	No hit
OCU_RS33665	HAD-IB family hydrolase	1	No	No hit	No hit	No hit	No hit	No hit	No hit	No hit	Hit	No hit
OCU_RS33670	glycerol-3-phosphate 1-O-acyltransferase	1	No	No hit	No hit	No hit	No hit	No hit	No hit	No hit	Hit	No hit
OCU_RS33690	energy-dependent translational throttle protein EttA	7	No	Hit	Hit	Hit	No hit	Hit	Hit	No hit	Hit	Hit
OCU_RS33785	ATP-dependent Clp protease proteolytic subunit	6	No	Hit	Hit	Hit	No hit	No hit	Hit	No hit	Hit	Hit
OCU_RS33840	bifunctional folylpolyglutamate synthase/dihydrofolate synthase	8	No	Hit	Hit	Hit	Hit	No hit	Hit	Hit	Hit	Hit
OCU_RS33855	ribonuclease E/G	3	No	Hit	Hit	No hit	No hit	No hit	Hit	No hit	No hit	No hit
OCU_RS33870	GTPase ObgE	7	No	Hit	No hit	Hit	Hit	No hit	Hit	Hit	Hit	Hit
OCU_RS33935	nicotinate-nucleotide adenylyltransferase	6	No	Hit	Hit	Hit	No hit	No hit	Hit	Hit	Hit	No hit
OCU_RS34125	phosphoadenylyl-sulfate reductase	6	No	Hit	Hit	Hit	No hit	No hit	Hit	No hit	Hit	Hit
OCU_RS34245	TetR/AcrR family transcriptional regulator	1	No	No hit	Hit	No hit	No hit	No hit	No hit	No hit	No hit	No hit
OCU_RS34320	hypothetical protein	1	No	Hit	No hit	No hit	No hit	No hit	No hit	No hit	No hit	No hit
OCU_RS34335	CoA transferase	1	No	No hit	No hit	No hit	No hit	No hit	No hit	No hit	Hit	No hit
OCU_RS34340	cytochrome P450	3	No	No hit	Hit	No hit	No hit	Hit	No hit	No hit	Hit	No hit
OCU_RS34345	TetR/AcrR family transcriptional regulator	2	No	No hit	Hit	No hit	Hit	No hit	No hit	No hit	No hit	No hit
OCU_RS34350	lipid-transfer protein	1	No	No hit	No hit	No hit	Hit	No hit	No hit	No hit	No hit	No hit
OCU_RS34365	Zn-ribbon domain-containing OB-fold protein	2	No	No hit	No hit	No hit	Hit	Hit	No hit	No hit	No hit	No hit
OCU_RS34370	hypothetical protein	2	No	No hit	No hit	No hit	Hit	Hit	No hit	No hit	No hit	No hit
OCU_RS34480	enoyl-CoA hydratase/isomerase family protein	2	No	No hit	No hit	No hit	Hit	No hit	No hit	No hit	Hit	No hit
OCU_RS34485	enoyl-CoA hydratase/isomerase family protein	2	No	No hit	No hit	No hit	Hit	No hit	No hit	No hit	Hit	No hit
OCU_RS34490	acyl-CoA dehydrogenase	3	No	No hit	No hit	No hit	Hit	Hit	No hit	No hit	Hit	No hit
OCU_RS34495	enoyl-CoA hydratase/isomerase family protein	4	No	No hit	No hit	Hit	Hit	Hit	No hit	No hit	Hit	No hit
OCU_RS34500	hypothetical protein	1	No	No hit	No hit	No hit	No hit	No hit	No hit	No hit	Hit	No hit
OCU_RS34505	enoyl-CoA hydratase	3	No	Hit	No hit	Hit	No hit	No hit	No hit	No hit	Hit	No hit
OCU_RS34510	SDR family NAD(P)-dependent oxidoreductase	2	No	No hit	No hit	Hit	No hit	No hit	No hit	No hit	Hit	No hit
OCU_RS34530	aldolase	5	No	Hit	Hit	Hit	No hit	No hit	No hit	No hit	Hit	Hit
OCU_RS34565	acyl-CoA dehydrogenase	2	No	No hit	Hit	Hit	No hit	No hit	No hit	No hit	No hit	No hit
OCU_RS34580	dihydrodipicolinate reductase	1	No	No hit	No hit	Hit	No hit	No hit	No hit	No hit	No hit	No hit
OCU_RS34590	cytochrome P450	1	No	No hit	No hit	Hit	No hit	No hit	No hit	No hit	No hit	No hit
OCU_RS34595	MarR family transcriptional regulator	3	No	Hit	No hit	Hit	Hit	No hit	No hit	No hit	No hit	No hit
OCU_RS34600	DUF2249 domain-containing protein	1	No	Hit	No hit	No hit	No hit	No hit	No hit	No hit	No hit	No hit
OCU_RS34605	ferredoxin	1	No	Hit	No hit	No hit	No hit	No hit	No hit	No hit	No hit	No hit
OCU_RS34610	hemerythrin domain-containing protein	1	No	Hit	No hit	No hit	No hit	No hit	No hit	No hit	No hit	No hit
OCU_RS34625	HTH domain-containing protein	2	No	Hit	No hit	No hit	No hit	No hit	No hit	No hit	Hit	No hit
OCU_RS34630	group III truncated hemoglobin	1	No	Hit	No hit	No hit	No hit	No hit	No hit	No hit	No hit	No hit
OCU_RS34660	PucR family transcriptional regulator	1	No	Hit	No hit	No hit	No hit	No hit	No hit	No hit	No hit	No hit
OCU_RS34665	hypothetical protein	1	No	Hit	No hit	No hit	No hit	No hit	No hit	No hit	No hit	No hit
OCU_RS34675	hypothetical protein	2	No	Hit	No hit	Hit	No hit	No hit	No hit	No hit	No hit	No hit
OCU_RS34700	hypothetical protein	5	No	Hit	Hit	No hit	Hit	No hit	Hit	No hit	Hit	No hit
OCU_RS34705	ABC transporter	4	No	Hit	No hit	No hit	Hit	No hit	Hit	No hit	Hit	No hit
OCU_RS34720	sulfite reductase flavoprotein subunit alpha	1	No	No hit	Hit	No hit	No hit	No hit	No hit	No hit	No hit	No hit
OCU_RS34765	non-ribosomal peptide synthetase	1	No	No hit	No hit	No hit	No hit	No hit	No hit	No hit	Hit	No hit
OCU_RS34780	SDR family NAD(P)-dependent oxidoreductase	2	No	No hit	No hit	No hit	Hit	No hit	No hit	No hit	Hit	No hit
OCU_RS34860	HlyC/CorC family transporter	1	No	No hit	No hit	No hit	No hit	No hit	No hit	No hit	Hit	No hit
OCU_RS34885	decaprenyl diphosphate synthase	6	No	Hit	No hit	Hit	No hit	No hit	Hit	Hit	Hit	Hit
OCU_RS35400	LLM class F420-dependent oxidoreductase	1	Yes	No hit	No hit	No hit	No hit	No hit	Hit	No hit	No hit	No hit
OCU_RS35410	cytochrome P450	1	No	No hit	No hit	No hit	No hit	Hit	No hit	No hit	No hit	No hit
OCU_RS35420	glycosyltransferase family 1 protein	3	No	No hit	No hit	No hit	No hit	No hit	Hit	No hit	Hit	Hit
OCU_RS35670	TetR/AcrR family transcriptional regulator	1	No	No hit	No hit	No hit	Hit	No hit	No hit	No hit	No hit	No hit
OCU_RS35690	acyl-CoA carboxylase subunit beta	1	No	No hit	No hit	No hit	No hit	No hit	Hit	No hit	No hit	No hit
OCU_RS35700	beta-ketoacyl-ACP synthase	6	No	Hit	Hit	Hit	No hit	Hit	No hit	No hit	Hit	Hit
OCU_RS35705	acyl carrier protein	6	No	Hit	Hit	Hit	No hit	Hit	No hit	No hit	Hit	Hit
OCU_RS35710	ACP S-malonyltransferase	4	No	Hit	Hit	Hit	No hit	No hit	Hit	No hit	No hit	No hit
OCU_RS35715	PucR family transcriptional regulator	7	No	Hit	Hit	Hit	No hit	No hit	Hit	Hit	Hit	Hit
OCU_RS35720	pyruvate dehydrogenase (acetyl-transferring), homodimeric type	1	No	Hit	No hit	No hit	No hit	No hit	No hit	No hit	No hit	No hit
OCU_RS35755	glyoxalase	2	No	No hit	No hit	Hit	Hit	No hit	No hit	No hit	No hit	No hit
OCU_RS35760	cobalamin biosynthesis protein	3	No	No hit	No hit	Hit	Hit	No hit	No hit	No hit	No hit	Hit
OCU_RS35765	SURF1 family protein	3	No	No hit	No hit	Hit	Hit	No hit	No hit	No hit	No hit	Hit
OCU_RS35785	Nif3-like dinuclear metal center hexameric protein	1	No	No hit	No hit	No hit	No hit	No hit	No hit	No hit	Hit	No hit
OCU_RS35790	hypothetical protein	3	No	No hit	No hit	Hit	Hit	No hit	No hit	No hit	Hit	No hit
OCU_RS35795	bifunctional RNase H/acid phosphatase	4	No	No hit	No hit	Hit	Hit	No hit	Hit	No hit	Hit	No hit
OCU_RS35800	glyoxalase	1	No	No hit	No hit	No hit	Hit	No hit	No hit	No hit	No hit	No hit
OCU_RS35820	hypothetical protein	2	No	No hit	No hit	Hit	No hit	No hit	No hit	No hit	Hit	No hit
OCU_RS35850	3-methyl-2-oxobutanoate hydroxymethyltransferase	4	No	No hit	No hit	Hit	No hit	No hit	Hit	Hit	No hit	Hit
OCU_RS35855	alpha/beta hydrolase	1	No	No hit	No hit	No hit	No hit	No hit	No hit	No hit	Hit	No hit
OCU_RS35865	type I glutamate--ammonia ligase	6	No	Hit	Hit	Hit	No hit	No hit	Hit	No hit	Hit	Hit
OCU_RS35870	bifunctional [glutamine synthetase] adenylyltransferase/[glutamine synthetase]-adenylyl-L-tyrosine phosphorylase	3	No	Hit	No hit	Hit	No hit	No hit	No hit	No hit	Hit	No hit
OCU_RS35950	leucyl aminopeptidase	4	No	No hit	No hit	Hit	Hit	No hit	Hit	No hit	Hit	No hit
OCU_RS35970	nicotinate-nucleotide--dimethylbenzimidazole phosphoribosyltransferase	1	No	No hit	No hit	No hit	Hit	No hit	No hit	No hit	No hit	No hit
OCU_RS36035	cytochrome bc complex cytochrome b subunit	2	No	No hit	No hit	Hit	No hit	No hit	Hit	No hit	No hit	No hit
OCU_RS36040	ubiquinol-cytochrome c reductase iron-sulfur subunit	5	No	Hit	No hit	Hit	Hit	Hit	Hit	No hit	No hit	No hit
OCU_RS36070	glycosyltransferase family 1 protein	6	No	No hit	No hit	Hit	No hit	Hit	Hit	Hit	Hit	Hit
OCU_RS36100	1-acyl-sn-glycerol-3-phosphate acyltransferase	6	No	No hit	Hit	Hit	No hit	No hit	Hit	Hit	Hit	Hit
OCU_RS36135	alpha-(1->6)-mannopyranosyltransferase A	1	No	No hit	Hit	No hit	No hit	No hit	No hit	No hit	No hit	No hit
OCU_RS36230	cell division protein FtsQ/DivIB	8	No	Hit	Hit	Hit	Hit	Hit	Hit	Hit	Hit	No hit
OCU_RS36250	cell division protein SepF	6	No	Hit	Hit	Hit	No hit	Hit	Hit	No hit	Hit	No hit
OCU_RS36425	quinone-dependent dihydroorotate dehydrogenase	8	No	Hit	Hit	Hit	Hit	No hit	Hit	Hit	Hit	Hit
OCU_RS36730	precorrin-4 C(11)-methyltransferase	2	No	No hit	No hit	Hit	No hit	No hit	No hit	No hit	Hit	No hit
OCU_RS36735	cobalt-precorrin-6A reductase	2	No	No hit	No hit	Hit	No hit	No hit	No hit	No hit	Hit	No hit
OCU_RS36790	cobaltochelatase subunit CobN	1	No	No hit	No hit	No hit	Hit	No hit	No hit	No hit	No hit	No hit
OCU_RS36835	type I polyketide synthase	1	No	No hit	No hit	No hit	No hit	No hit	No hit	No hit	Hit	No hit
OCU_RS36840	sugar epimerase family protein	2	No	Hit	No hit	No hit	No hit	No hit	No hit	No hit	Hit	No hit
OCU_RS36865	hypothetical protein	1	No	No hit	No hit	Hit	No hit	No hit	No hit	No hit	No hit	No hit
OCU_RS37065	acyl-CoA dehydrogenase	1	No	No hit	No hit	Hit	No hit	No hit	No hit	No hit	No hit	No hit
OCU_RS37070	sigma-70 family RNA polymerase sigma factor	1	No	No hit	No hit	Hit	No hit	No hit	No hit	No hit	No hit	No hit
OCU_RS38105	hypothetical protein	1	No	No hit	No hit	No hit	No hit	No hit	No hit	No hit	Hit	No hit
OCU_RS38125	glycine dehydrogenase (aminomethyl-transferring)	1	Yes	No hit	Hit	No hit	No hit	No hit	No hit	No hit	No hit	No hit
OCU_RS38130	MerR family transcriptional regulator	1	No	No hit	No hit	Hit	No hit	No hit	No hit	No hit	No hit	No hit
OCU_RS38140	MerR family transcriptional regulator	6	No	Hit	Hit	Hit	No hit	No hit	Hit	No hit	Hit	Hit
OCU_RS38145	FHA domain-containing protein	1	No	No hit	No hit	No hit	No hit	No hit	No hit	No hit	Hit	No hit
OCU_RS38345	type VII secretion protein EccC	4	Yes	No hit	Hit	No hit	Hit	Hit	Hit	No hit	No hit	No hit
OCU_RS38350	type VII secretion protein EccB	2	No	No hit	No hit	No hit	No hit	Hit	Hit	No hit	No hit	No hit
OCU_RS38590	enoyl-CoA hydratase/isomerase family protein	1	No	No hit	No hit	Hit	No hit	No hit	No hit	No hit	No hit	No hit
OCU_RS39065	(d)CMP kinase	6	No	Hit	Hit	Hit	Hit	No hit	Hit	Hit	No hit	No hit
OCU_RS39070	rRNA pseudouridine synthase	3	No	No hit	No hit	Hit	Hit	No hit	No hit	Hit	No hit	No hit
OCU_RS39120	DNA repair protein RecN	1	No	No hit	No hit	No hit	No hit	Hit	No hit	No hit	No hit	No hit
OCU_RS39130	TlyA family RNA methyltransferase	4	No	No hit	No hit	Hit	No hit	Hit	Hit	No hit	No hit	Hit
OCU_RS39155	tyrosine--tRNA ligase	4	No	Hit	No hit	Hit	No hit	No hit	Hit	Hit	No hit	No hit
OCU_RS39250	type I polyketide synthase	2	No	No hit	No hit	No hit	Hit	No hit	No hit	No hit	Hit	No hit
OCU_RS39255	type I polyketide synthase	1	No	No hit	No hit	No hit	No hit	No hit	No hit	No hit	Hit	No hit
OCU_RS39265	argininosuccinate lyase	8	No	Hit	Hit	Hit	Hit	Hit	Hit	Hit	Hit	No hit
OCU_RS39280	ornithine carbamoyltransferase	4	No	No hit	No hit	Hit	No hit	Hit	No hit	No hit	Hit	Hit
OCU_RS39285	acetylornithine transaminase	7	No	Hit	Hit	Hit	No hit	Hit	Hit	No hit	Hit	Hit
OCU_RS39295	bifunctional glutamate N-acetyltransferase/amino-acid acetyltransferase ArgJ	8	No	Hit	Hit	Hit	Hit	No hit	Hit	Hit	Hit	Hit
OCU_RS39485	30S ribosomal protein S1	2	No	No hit	No hit	No hit	No hit	No hit	No hit	Hit	Hit	No hit
OCU_RS39500	DNA polymerase I	3	No	No hit	No hit	No hit	Hit	No hit	Hit	No hit	Hit	No hit
OCU_RS39545	thiol reductant ABC exporter subunit CydD	2	No	No hit	No hit	Hit	No hit	No hit	No hit	No hit	Hit	No hit
OCU_RS39550	thiol reductant ABC exporter subunit CydC	1	No	No hit	No hit	No hit	No hit	No hit	No hit	No hit	Hit	No hit
OCU_RS39580	prolipoprotein diacylglyceryl transferase	2	No	Hit	No hit	No hit	No hit	No hit	No hit	No hit	Hit	No hit
OCU_RS39595	indole-3-glycerol phosphate synthase TrpC	5	No	Hit	Hit	Hit	Hit	No hit	No hit	No hit	Hit	No hit
OCU_RS39620	phosphoribosyl-AMP cyclohydrolase	4	No	No hit	No hit	Hit	No hit	No hit	Hit	Hit	No hit	Hit
OCU_RS39625	imidazole glycerol phosphate synthase subunit HisF	4	No	No hit	No hit	Hit	No hit	No hit	Hit	Hit	No hit	Hit
OCU_RS39635	bifunctional 1-(5-phosphoribosyl)-5-((5- phosphoribosylamino)methylideneamino)imidazole-4- carboxamide isomerase/phosphoribosylanthranilate isomerase PriA	4	No	Hit	No hit	Hit	No hit	Hit	No hit	No hit	Hit	No hit
OCU_RS39645	imidazoleglycerol-phosphate dehydratase HisB	8	No	Hit	Hit	Hit	No hit	Hit	Hit	Hit	Hit	Hit
OCU_RS39665	carboxylating nicotinate-nucleotide diphosphorylase	1	No	No hit	No hit	No hit	No hit	No hit	Hit	No hit	No hit	No hit
OCU_RS39670	L-aspartate oxidase	6	No	No hit	Hit	Hit	Hit	No hit	Hit	No hit	Hit	Hit
OCU_RS39675	quinolinate synthase NadA	7	No	Hit	Hit	Hit	Hit	Hit	Hit	No hit	Hit	No hit
OCU_RS39740	2'-5' RNA ligase family protein	1	No	No hit	No hit	No hit	Hit	No hit	No hit	No hit	No hit	No hit
OCU_RS39745	ATP-dependent dethiobiotin synthetase BioD	1	No	No hit	No hit	No hit	Hit	No hit	No hit	No hit	No hit	No hit
OCU_RS39790	aminotransferase class I/II-fold pyridoxal phosphate-dependent enzyme	1	No	No hit	No hit	No hit	Hit	No hit	No hit	No hit	No hit	No hit
OCU_RS39840	PPOX class F420-dependent oxidoreductase	3	No	No hit	No hit	No hit	Hit	Hit	No hit	No hit	Hit	No hit
OCU_RS40190	beta-ketoacyl-ACP reductase	6	No	No hit	No hit	Hit	Hit	No hit	Hit	Hit	Hit	Hit
OCU_RS40220	NlpC/P60 family peptidoglycan endopeptidase RipA	1	No	No hit	Hit	No hit	No hit	No hit	No hit	No hit	No hit	No hit
OCU_RS40300	SUF system NifU family Fe-S cluster assembly protein	4	No	No hit	Hit	No hit	No hit	Hit	Hit	No hit	No hit	Hit
OCU_RS40305	cysteine desulfurase	4	No	No hit	Hit	No hit	No hit	Hit	Hit	No hit	No hit	Hit
OCU_RS40330	membrane protein	4	No	No hit	Hit	No hit	No hit	No hit	Hit	No hit	Hit	Hit
OCU_RS40365	transketolase	8	No	Hit	Hit	Hit	Hit	Hit	Hit	No hit	Hit	Hit
OCU_RS40535	riboflavin synthase	1	No	No hit	No hit	No hit	No hit	No hit	No hit	No hit	Hit	No hit
OCU_RS40540	LppX_LprAFG lipoprotein	2	No	No hit	Hit	No hit	No hit	No hit	No hit	No hit	Hit	No hit
OCU_RS40605	methionine adenosyltransferase	6	No	Hit	Hit	Hit	No hit	No hit	No hit	Hit	Hit	Hit
OCU_RS40610	bifunctional phosphopantothenoylcysteine decarboxylase/phosphopantothenate--cysteine ligase CoaBC	3	No	No hit	Hit	Hit	No hit	No hit	Hit	No hit	No hit	No hit
OCU_RS40650	hypothetical protein	5	No	No hit	Hit	No hit	Hit	Hit	No hit	No hit	Hit	Hit
OCU_RS40665	bifunctional pyr operon transcriptional regulator/uracil phosphoribosyltransferase PyrR	1	No	No hit	No hit	No hit	Hit	No hit	No hit	No hit	No hit	No hit
OCU_RS40725	elongation factor P	1	No	No hit	No hit	No hit	No hit	No hit	Hit	No hit	No hit	No hit
OCU_RS40770	shikimate dehydrogenase	2	No	No hit	No hit	Hit	No hit	No hit	No hit	No hit	Hit	No hit
OCU_RS40775	endolytic transglycosylase MltG	1	No	No hit	No hit	No hit	No hit	No hit	No hit	No hit	Hit	No hit
OCU_RS40855	aspartate--tRNA ligase	8	No	Hit	Hit	Hit	No hit	Hit	Hit	Hit	Hit	Hit
OCU_RS40930	MBL fold metallo-hydrolase	1	No	No hit	Hit	No hit	No hit	No hit	No hit	No hit	No hit	No hit
OCU_RS40995	Holliday junction branch migration DNA helicase RuvB	2	No	No hit	No hit	Hit	No hit	No hit	No hit	No hit	Hit	No hit
OCU_RS41000	Holliday junction branch migration protein RuvA	2	No	No hit	No hit	Hit	No hit	No hit	No hit	No hit	Hit	No hit
OCU_RS41005	crossover junction endodeoxyribonuclease RuvC	2	No	No hit	No hit	Hit	No hit	No hit	No hit	No hit	Hit	No hit
OCU_RS41225	YbdK family carboxylate-amine ligase	1	No	No hit	No hit	No hit	No hit	No hit	No hit	No hit	Hit	No hit
OCU_RS41230	hypothetical protein	3	No	No hit	No hit	No hit	No hit	Hit	Hit	No hit	Hit	No hit
OCU_RS41345	hypothetical protein	1	No	No hit	No hit	Hit	No hit	No hit	No hit	No hit	No hit	No hit
OCU_RS41480	DUF2029 domain-containing protein	8	No	Hit	Hit	Hit	Hit	Hit	Hit	No hit	Hit	Hit
OCU_RS41485	peptide-methionine (R)-S-oxide reductase	1	No	No hit	No hit	No hit	Hit	No hit	No hit	No hit	No hit	No hit
OCU_RS41495	hypothetical protein	7	No	Hit	Hit	Hit	No hit	Hit	Hit	No hit	Hit	Hit
OCU_RS41535	membrane protein	2	Yes	No hit	No hit	No hit	Hit	No hit	No hit	No hit	Hit	No hit
OCU_RS41540	class I SAM-dependent RNA methyltransferase	4	No	No hit	No hit	No hit	Hit	Hit	No hit	Hit	Hit	No hit
OCU_RS41610	RNA polymerase sigma factor	6	No	Hit	Hit	Hit	No hit	No hit	Hit	No hit	Hit	Hit
OCU_RS41650	metal-dependent transcriptional regulator	1	No	Hit	No hit	No hit	No hit	No hit	No hit	No hit	No hit	No hit
OCU_RS41830	DNA translocase FtsK	8	No	Hit	Hit	Hit	Hit	Hit	Hit	No hit	Hit	Hit
OCU_RS41865	winged helix-turn-helix domain-containing protein	1	No	No hit	No hit	No hit	No hit	No hit	No hit	No hit	Hit	No hit
OCU_RS41875	dihydrofolate reductase	1	No	Hit	No hit	No hit	No hit	No hit	No hit	No hit	No hit	No hit
OCU_RS41910	ATP-grasp domain-containing protein	2	No	No hit	No hit	No hit	Hit	No hit	No hit	No hit	Hit	No hit
OCU_RS41915	long-chain fatty acid--CoA ligase	3	No	No hit	No hit	Hit	No hit	Hit	No hit	No hit	Hit	No hit
OCU_RS42000	polyribonucleotide nucleotidyltransferase	7	No	Hit	Hit	Hit	No hit	Hit	Hit	No hit	Hit	Hit
OCU_RS42020	bifunctional riboflavin kinase/FAD synthetase	1	No	No hit	No hit	No hit	No hit	No hit	Hit	No hit	No hit	No hit
OCU_RS42090	bifunctional oligoribonuclease/PAP phosphatase NrnA	1	No	No hit	No hit	No hit	No hit	No hit	No hit	No hit	Hit	No hit
OCU_RS42095	30S ribosome-binding factor RbfA	1	No	No hit	No hit	No hit	No hit	No hit	No hit	No hit	Hit	No hit
OCU_RS42100	translation initiation factor IF-2	8	No	Hit	Hit	Hit	No hit	Hit	Hit	Hit	Hit	Hit
OCU_RS42125	DUF4439 domain-containing protein	1	No	No hit	No hit	No hit	No hit	No hit	No hit	No hit	Hit	No hit
OCU_RS42135	MFS transporter	5	No	Hit	Hit	Hit	No hit	No hit	No hit	No hit	Hit	Hit
OCU_RS42140	uroporphyrinogen-III C-methyltransferase	8	No	Hit	Hit	Hit	Hit	No hit	Hit	Hit	Hit	Hit
OCU_RS42145	cobyrinate a,c-diamide synthase	2	No	No hit	No hit	Hit	Hit	No hit	No hit	No hit	No hit	No hit
OCU_RS42155	VWA domain-containing protein	3	No	No hit	No hit	Hit	Hit	No hit	No hit	Hit	No hit	No hit
OCU_RS42240	type I methionyl aminopeptidase	4	No	No hit	Hit	No hit	No hit	No hit	Hit	No hit	Hit	Hit
OCU_RS42250	penicillin-binding transpeptidase domain-containing protein	1	No	No hit	No hit	No hit	No hit	No hit	No hit	No hit	Hit	No hit
OCU_RS42295	phosphatidate cytidylyltransferase	5	No	No hit	No hit	No hit	Hit	Hit	Hit	No hit	Hit	Hit
OCU_RS42305	UMP kinase	8	No	Hit	Hit	Hit	Hit	Hit	Hit	No hit	Hit	Hit
OCU_RS42380	elongation factor Ts	6	No	Hit	Hit	Hit	Hit	No hit	Hit	No hit	Hit	No hit
OCU_RS42455	signal peptidase I	5	No	Hit	No hit	Hit	No hit	No hit	Hit	No hit	Hit	Hit
OCU_RS42460	50S ribosomal protein L19	1	No	No hit	No hit	No hit	No hit	No hit	No hit	No hit	Hit	No hit
OCU_RS42470	tRNA (guanosine(37)-N1)-methyltransferase TrmD	2	No	No hit	No hit	Hit	No hit	No hit	Hit	No hit	No hit	No hit
OCU_RS42545	[protein-PII] uridylyltransferase	1	No	No hit	No hit	Hit	No hit	No hit	No hit	No hit	No hit	No hit
OCU_RS42595	DUF177 domain-containing protein	3	No	No hit	Hit	Hit	No hit	No hit	Hit	No hit	No hit	No hit
OCU_RS42625	vitamin K epoxide reductase family protein	8	No	Hit	Hit	Hit	Hit	Hit	Hit	No hit	Hit	Hit
OCU_RS42630	DsbA family protein	8	No	Hit	Hit	Hit	Hit	Hit	Hit	No hit	Hit	Hit
OCU_RS42640	aldo/keto reductase	2	No	Hit	No hit	Hit	No hit	No hit	No hit	No hit	No hit	No hit
OCU_RS42705	uracil-DNA glycosylase	1	No	No hit	No hit	No hit	Hit	No hit	No hit	No hit	No hit	No hit
OCU_RS42710	thiamine-phosphate kinase	1	No	No hit	No hit	No hit	Hit	No hit	No hit	No hit	No hit	No hit
OCU_RS42715	DUF3515 domain-containing protein	1	No	No hit	No hit	No hit	Hit	No hit	No hit	No hit	No hit	No hit
OCU_RS42720	D-alanine--D-alanine ligase	7	No	Hit	Hit	Hit	Hit	No hit	Hit	No hit	Hit	Hit
OCU_RS42745	HU family DNA-binding protein	1	No	No hit	No hit	Hit	No hit	No hit	No hit	No hit	No hit	No hit
OCU_RS42750	3-isopropylmalate dehydratase small subunit	8	No	Hit	Hit	Hit	Hit	No hit	Hit	Hit	Hit	Hit
OCU_RS42755	3-isopropylmalate dehydratase large subunit	8	No	Hit	Hit	Hit	Hit	Hit	Hit	No hit	Hit	Hit
OCU_RS42800	3-isopropylmalate dehydrogenase	8	No	Hit	Hit	Hit	No hit	Hit	Hit	Hit	Hit	Hit
OCU_RS42805	phosphoglycerate dehydrogenase	5	No	Hit	Hit	Hit	No hit	Hit	Hit	No hit	No hit	No hit
OCU_RS42835	PH domain-containing protein	1	No	No hit	No hit	No hit	Hit	No hit	No hit	No hit	No hit	No hit
OCU_RS42925	NAD-dependent DNA ligase LigA	7	No	Hit	Hit	Hit	Hit	No hit	Hit	No hit	Hit	Hit
OCU_RS42985	glycoside hydrolase family 57 protein	1	No	No hit	No hit	No hit	Hit	No hit	No hit	No hit	No hit	No hit
OCU_RS42990	glycosyltransferase family 1 protein	1	Yes	No hit	No hit	No hit	Hit	No hit	No hit	No hit	No hit	No hit
OCU_RS42995	TIGR01777 family protein	1	No	No hit	No hit	No hit	Hit	No hit	No hit	No hit	No hit	No hit
OCU_RS43000	NAD-dependent epimerase/dehydratase family protein	1	No	No hit	No hit	No hit	Hit	No hit	No hit	No hit	No hit	No hit
OCU_RS43005	hypothetical protein	1	No	No hit	No hit	No hit	Hit	No hit	No hit	No hit	No hit	No hit
OCU_RS43025	phytoene desaturase	1	No	No hit	No hit	Hit	No hit	No hit	No hit	No hit	No hit	No hit
OCU_RS43030	phytoene/squalene synthase family protein	1	No	No hit	No hit	Hit	No hit	No hit	No hit	No hit	No hit	No hit
OCU_RS43040	lycopene cyclase domain-containing protein	1	No	No hit	No hit	No hit	Hit	No hit	No hit	No hit	No hit	No hit
OCU_RS43055	Rieske (2Fe-2S) protein	1	No	No hit	No hit	No hit	Hit	No hit	No hit	No hit	No hit	No hit
OCU_RS43120	hypothetical protein	1	No	No hit	No hit	No hit	No hit	No hit	No hit	No hit	Hit	No hit
OCU_RS43160	phosphoserine phosphatase SerB	7	No	Hit	Hit	Hit	Hit	Hit	Hit	No hit	No hit	Hit
OCU_RS43165	cytochrome c oxidase subunit I	7	No	Hit	Hit	Hit	Hit	Hit	Hit	No hit	No hit	Hit
OCU_RS43185	class 1b ribonucleoside-diphosphate reductase subunit beta	5	No	Hit	Hit	Hit	No hit	No hit	No hit	No hit	Hit	Hit
OCU_RS43220	class Ib ribonucleoside-diphosphate reductase assembly flavoprotein NrdI	4	No	Hit	Hit	No hit	Hit	No hit	No hit	No hit	Hit	No hit
OCU_RS43315	acetyl-CoA C-acetyltransferase	1	No	No hit	No hit	No hit	Hit	No hit	No hit	No hit	No hit	No hit
OCU_RS43320	enoyl-CoA hydratase/isomerase family protein	1	No	No hit	No hit	No hit	Hit	No hit	No hit	No hit	No hit	No hit
OCU_RS43600	hypothetical protein	3	No	Hit	Hit	Hit	No hit	No hit	No hit	No hit	No hit	No hit
OCU_RS43700	ABC transporter permease	1	No	No hit	No hit	No hit	No hit	No hit	No hit	No hit	Hit	No hit
OCU_RS43705	cell division ATP-binding protein FtsE	1	No	No hit	No hit	No hit	No hit	No hit	No hit	No hit	Hit	No hit
OCU_RS43805	CoA transferase	1	No	No hit	No hit	Hit	No hit	No hit	No hit	No hit	No hit	No hit
OCU_RS43870	NADH oxidoreductase (quinone) subunit F	1	No	No hit	No hit	Hit	No hit	No hit	No hit	No hit	No hit	No hit
OCU_RS43900	NADH-quinone oxidoreductase subunit L	1	No	No hit	No hit	Hit	No hit	No hit	No hit	No hit	No hit	No hit
OCU_RS43905	NADH-quinone oxidoreductase subunit M	1	No	No hit	No hit	Hit	No hit	No hit	No hit	No hit	No hit	No hit
OCU_RS43910	NADH-quinone oxidoreductase subunit NuoN	1	No	No hit	No hit	Hit	No hit	No hit	No hit	No hit	No hit	No hit
OCU_RS43940	SDR family oxidoreductase	1	No	No hit	No hit	No hit	Hit	No hit	No hit	No hit	No hit	No hit
OCU_RS43945	TetR/AcrR family transcriptional regulator	1	No	No hit	No hit	No hit	Hit	No hit	No hit	No hit	No hit	No hit
OCU_RS44000	acyl-CoA dehydrogenase	3	No	No hit	No hit	Hit	Hit	No hit	No hit	No hit	Hit	No hit
OCU_RS44005	PIG-L family deacetylase	3	Yes	No hit	No hit	Hit	Hit	No hit	No hit	No hit	Hit	No hit
OCU_RS44010	hypothetical protein	1	No	No hit	No hit	No hit	No hit	No hit	No hit	No hit	Hit	No hit
OCU_RS44170	hypothetical protein	1	No	Hit	No hit	No hit	No hit	No hit	No hit	No hit	No hit	No hit
OCU_RS44185	NAD(P)/FAD-dependent oxidoreductase	1	No	Hit	No hit	No hit	No hit	No hit	No hit	No hit	No hit	No hit
OCU_RS44410	ATP-dependent helicase	1	No	No hit	No hit	No hit	No hit	No hit	Hit	No hit	No hit	No hit
OCU_RS44435	adenylyltransferase/sulfurtransferase MoeZ	6	No	Hit	Hit	Hit	No hit	No hit	Hit	No hit	Hit	Hit
OCU_RS44485	isochorismate synthase	1	No	No hit	No hit	No hit	No hit	No hit	No hit	No hit	No hit	Hit
OCU_RS44705	adenosylhomocysteinase	4	No	Hit	Hit	No hit	No hit	No hit	No hit	No hit	Hit	Hit
OCU_RS44795	dTDP-4-dehydrorhamnose reductase	8	No	Hit	No hit	Hit	Hit	Hit	Hit	Hit	Hit	Hit
OCU_RS44940	acyl-CoA carboxylase subunit epsilon	6	No	No hit	Hit	No hit	Hit	No hit	Hit	Hit	Hit	Hit
OCU_RS44960	acetyl/propionyl/methylcrotonyl-CoA carboxylase subunit alpha	7	No	Hit	Hit	Hit	Hit	No hit	Hit	No hit	Hit	Hit
OCU_RS45225	multidrug efflux SMR transporter	1	No	No hit	No hit	No hit	Hit	No hit	No hit	No hit	No hit	No hit
OCU_RS45250	NADP-dependent isocitrate dehydrogenase	3	No	No hit	Hit	No hit	Hit	No hit	No hit	No hit	Hit	No hit
OCU_RS45290	bifunctional methylenetetrahydrofolate dehydrogenase/methenyltetrahydrofolate cyclohydrolase	7	No	Hit	Hit	No hit	No hit	Hit	Hit	Hit	Hit	Hit
OCU_RS45465	IMP dehydrogenase	2	No	No hit	No hit	No hit	No hit	No hit	Hit	No hit	No hit	Hit
OCU_RS45540	co-chaperone GroES	1	No	No hit	No hit	No hit	No hit	Hit	No hit	No hit	No hit	No hit
OCU_RS45630	phosphoglucosamine mutase	6	No	Hit	Hit	Hit	No hit	No hit	Hit	No hit	Hit	Hit
OCU_RS45635	30S ribosomal protein S9	8	No	Hit	Hit	Hit	Hit	No hit	Hit	Hit	Hit	Hit
OCU_RS45640	50S ribosomal protein L13	8	No	Hit	Hit	Hit	Hit	No hit	Hit	Hit	Hit	Hit
OCU_RS45695	50S ribosomal protein L17	1	No	No hit	No hit	No hit	No hit	No hit	No hit	No hit	No hit	Hit
OCU_RS45700	DNA-directed RNA polymerase subunit alpha	5	No	Hit	No hit	Hit	No hit	No hit	No hit	Hit	Hit	Hit
OCU_RS45785	(2Fe-2S)-binding protein	1	No	No hit	No hit	Hit	No hit	No hit	No hit	No hit	No hit	No hit
OCU_RS45885	preprotein translocase subunit SecY	7	No	Hit	Hit	Hit	No hit	Hit	Hit	No hit	Hit	Hit
OCU_RS45915	MBL fold metallo-hydrolase	1	No	No hit	No hit	Hit	No hit	No hit	No hit	No hit	No hit	No hit
OCU_RS45965	30S ribosomal protein S5	1	No	No hit	No hit	No hit	Hit	No hit	No hit	No hit	No hit	No hit
OCU_RS45985	type Z 30S ribosomal protein S14	3	No	Hit	No hit	No hit	Hit	No hit	No hit	No hit	Hit	No hit
OCU_RS45990	50S ribosomal protein L5	4	No	Hit	No hit	No hit	Hit	No hit	No hit	No hit	Hit	Hit
OCU_RS46000	50S ribosomal protein L14	2	No	No hit	No hit	No hit	No hit	No hit	No hit	No hit	Hit	Hit
OCU_RS46020	30S ribosomal protein S17	5	No	No hit	No hit	Hit	Hit	Hit	Hit	No hit	No hit	Hit
OCU_RS46025	50S ribosomal protein L29	5	No	No hit	No hit	Hit	Hit	Hit	Hit	No hit	No hit	Hit
OCU_RS46055	50S ribosomal protein L23	8	No	Hit	Hit	Hit	Hit	Hit	No hit	Hit	Hit	Hit
OCU_RS46070	30S ribosomal protein S10	2	No	No hit	Hit	No hit	No hit	No hit	No hit	No hit	Hit	No hit
OCU_RS46125	DUF2332 family protein	1	No	No hit	No hit	No hit	No hit	No hit	Hit	No hit	No hit	No hit
OCU_RS46160	elongation factor Tu	7	No	Hit	Hit	Hit	No hit	Hit	Hit	No hit	Hit	Hit
OCU_RS46165	elongation factor G	6	No	Hit	Hit	Hit	No hit	No hit	Hit	No hit	Hit	Hit
OCU_RS46170	30S ribosomal protein S7	5	No	Hit	Hit	Hit	No hit	Hit	No hit	No hit	No hit	Hit
OCU_RS46175	30S ribosomal protein S12	5	No	Hit	Hit	Hit	No hit	Hit	No hit	No hit	No hit	Hit
OCU_RS46230	DNA-directed RNA polymerase subunit beta	8	No	Hit	Hit	Hit	No hit	Hit	Hit	Hit	Hit	Hit
OCU_RS46255	50S ribosomal protein L10	1	No	No hit	No hit	No hit	No hit	No hit	Hit	No hit	No hit	No hit
OCU_RS46290	AarF/ABC1/UbiB kinase family protein	4	No	Hit	Hit	Hit	No hit	No hit	No hit	No hit	Hit	No hit
OCU_RS46325	50S ribosomal protein L11	6	No	Hit	Hit	No hit	No hit	Hit	Hit	Hit	Hit	No hit
OCU_RS46330	transcription termination/antitermination protein NusG	8	No	Hit	Hit	Hit	No hit	Hit	Hit	Hit	Hit	Hit
OCU_RS46335	preprotein translocase subunit SecE	8	No	Hit	Hit	Hit	No hit	Hit	Hit	Hit	Hit	Hit
OCU_RS46345	(3R)-hydroxyacyl-ACP dehydratase subunit HadC	6	No	Hit	No hit	Hit	No hit	Hit	Hit	No hit	Hit	Hit
OCU_RS46350	(3R)-hydroxyacyl-ACP dehydratase subunit HadB	8	No	Hit	Hit	Hit	No hit	Hit	Hit	Hit	Hit	Hit
OCU_RS46355	(3R)-hydroxyacyl-ACP dehydratase subunit HadA	8	No	Hit	2	Hit	No hit	Hit	Hit	No hit	Hit	Hit
OCU_RS46440	exodeoxyribonuclease V subunit alpha	2	No	No hit	No hit	Hit	No hit	No hit	Hit	No hit	No hit	No hit
OCU_RS46615	membrane protein	2	No	No hit	Hit	No hit	No hit	Hit	No hit	No hit	No hit	No hit
OCU_RS46620	2-succinyl-5-enolpyruvyl-6-hydroxy-3- cyclohexene-1-carboxylic-acid synthase	5	No	No hit	Hit	Hit	No hit	Hit	Hit	No hit	No hit	Hit
OCU_RS46675	1,4-dihydroxy-2-naphthoyl-CoA synthase	4	No	Hit	Hit	Hit	No hit	No hit	Hit	No hit	No hit	No hit
OCU_RS46775	cytochrome c biogenesis protein	2	No	No hit	No hit	Hit	No hit	No hit	Hit	No hit	No hit	No hit
OCU_RS46780	cytochrome c biogenesis protein CcdA	2	No	No hit	No hit	Hit	No hit	No hit	Hit	No hit	No hit	No hit
OCU_RS46795	glutamate-1-semialdehyde-2,1-aminomutase	8	No	Hit	Hit	Hit	Hit	Hit	Hit	No hit	Hit	Hit
OCU_RS46875	porphobilinogen synthase	8	No	Hit	Hit	Hit	No hit	Hit	Hit	Hit	Hit	Hit
OCU_RS46885	hydroxymethylbilane synthase	2	No	Hit	Hit	No hit	No hit	No hit	No hit	No hit	No hit	No hit
OCU_RS46920	HAD-IB family hydrolase	3	No	Hit	Hit	No hit	No hit	No hit	No hit	No hit	Hit	No hit
OCU_RS46925	hypothetical protein	1	No	No hit	No hit	No hit	No hit	No hit	Hit	No hit	No hit	No hit
OCU_RS46990	phosphoglyceromutase	6	No	Hit	Hit	Hit	No hit	No hit	Hit	No hit	Hit	Hit
OCU_RS46995	YbjN domain-containing protein	2	No	No hit	Hit	No hit	No hit	No hit	No hit	No hit	No hit	Hit
OCU_RS47020	UDP-N-acetylmuramate dehydrogenase	8	No	Hit	Hit	Hit	No hit	Hit	Hit	Hit	Hit	Hit
OCU_RS47280	AAA family ATPase	2	No	No hit	No hit	No hit	Hit	No hit	Hit	No hit	No hit	No hit
OCU_RS47285	TetR/AcrR family transcriptional regulator	2	No	No hit	No hit	No hit	Hit	No hit	Hit	No hit	No hit	No hit
OCU_RS47380	phosphomethylpyrimidine synthase ThiC	8	No	Hit	Hit	Hit	Hit	Hit	Hit	No hit	Hit	Hit
OCU_RS47385	bifunctional hydroxymethylpyrimidine kinase/phosphomethylpyrimidine kinase	4	No	No hit	Hit	Hit	Hit	Hit	No hit	No hit	No hit	No hit
OCU_RS47390	alpha/beta hydrolase	4	No	No hit	Hit	Hit	Hit	No hit	Hit	No hit	No hit	No hit
OCU_RS47480	thiazole synthase	2	No	No hit	Hit	No hit	No hit	Hit	No hit	No hit	No hit	No hit
OCU_RS47730	MerR family transcriptional regulator	2	No	No hit	Hit	Hit	No hit	No hit	No hit	No hit	No hit	No hit
OCU_RS47735	molecular chaperone DnaJ	1	No	No hit	Hit	No hit	No hit	No hit	No hit	No hit	No hit	No hit
OCU_RS47765	hypothetical protein	3	No	Hit	Hit	Hit	No hit	No hit	No hit	No hit	No hit	No hit
OCU_RS47770	hypothetical protein	1	No	No hit	No hit	No hit	No hit	No hit	No hit	No hit	No hit	Hit
OCU_RS47790	(Fe-S)-binding protein	5	No	No hit	Hit	No hit	No hit	No hit	Hit	Hit	Hit	Hit
OCU_RS47795	pyridoxal phosphate-dependent aminotransferase	8	No	Hit	Hit	Hit	No hit	Hit	Hit	Hit	Hit	Hit
OCU_RS48110	type VII secretion-associated serine protease mycosin	8	Yes	Hit	Hit	No hit	Hit	Hit	Hit	Hit	Hit	Hit
OCU_RS48115	type VII secretion integral membrane protein EccD	8	No	Hit	Hit	No hit	Hit	Hit	Hit	Hit	Hit	Hit
OCU_RS48135	PPE family protein	8	Yes	Hit	Hit	No hit	Hit	Hit	Hit	Hit	Hit	Hit
OCU_RS48220	acyltransferase	1	No	No hit	Hit	No hit	No hit	No hit	No hit	No hit	No hit	No hit
OCU_RS48385	dehydratase	1	No	No hit	No hit	Hit	No hit	No hit	No hit	No hit	No hit	No hit
OCU_RS48525	acyltransferase	4	No	No hit	No hit	Hit	No hit	No hit	Hit	No hit	Hit	Hit
OCU_RS48530	DUF3068 domain-containing protein	7	No	Hit	Hit	Hit	Hit	No hit	Hit	No hit	Hit	Hit
OCU_RS48540	glycosyltransferase family 1 protein	8	No	Hit	Hit	Hit	Hit	No hit	Hit	Hit	Hit	Hit
OCU_RS48545	DedA family protein	1	No	No hit	No hit	No hit	Hit	No hit	No hit	No hit	No hit	No hit
OCU_RS48555	class I SAM-dependent methyltransferase	8	No	Hit	Hit	Hit	Hit	No hit	Hit	Hit	Hit	Hit
OCU_RS48625	acyl-CoA transferase	1	No	No hit	No hit	No hit	Hit	No hit	No hit	No hit	No hit	No hit
OCU_RS49345	acyltransferase family protein	1	Yes	No hit	No hit	No hit	No hit	No hit	No hit	No hit	Hit	No hit
OCU_RS49680	hypothetical protein	1	No	No hit	No hit	Hit	No hit	No hit	No hit	No hit	No hit	No hit
OCU_RS49860	CCA tRNA nucleotidyltransferase	7	No	Hit	Hit	Hit	No hit	Hit	Hit	No hit	Hit	Hit
OCU_RS49930	ParA family protein	7	No	Hit	Hit	Hit	Hit	Hit	No hit	No hit	Hit	Hit
OCU_RS49945	membrane protein insertase YidC	6	No	Hit	Hit	Hit	No hit	Hit	Hit	No hit	Hit	No hit
OCU_RS50000	TetR/AcrR family transcriptional regulator	1	No	No hit	Hit	No hit	No hit	No hit	No hit	No hit	No hit	No hit
OCU_RS50345	hypothetical protein	2	No	Hit	Hit	No hit	No hit	No hit	No hit	No hit	No hit	No hit
OCU_RS50735	hypothetical protein	1	No	Hit	No hit	No hit	No hit	No hit	No hit	No hit	No hit	No hit

## Sheet: accessory (ES or GD)
Locus_tag	Product	Number of hit strains	Shared with hypoxic pellicle formation in ATCC13950	ATCC13950	M.i.198	M.i.27	M018	M003	M019	M021	M001	MOTT64
OCU_RS25080	aminodeoxychorismate/anthranilate synthase component II	1	No	No hit	No hit	No hit	No hit	Hit	No hit	No hit	No hit	No hit
OCU_RS25090	serine/threonine protein kinase	4	No	Hit	Hit	No hit	Hit	Hit	No hit	No hit	No hit	No hit
OCU_RS25105	serine/threonine-protein phosphatase	3	No	Hit	No hit	No hit	Hit	No hit	No hit	No hit	Hit	No hit
OCU_RS25160	hypothetical protein	4	No	Hit	Hit	Hit	No hit	No hit	Hit	No hit	No hit	No hit
OCU_RS25610	PE family protein	1	No	No hit	No hit	No hit	Hit	No hit	No hit	No hit	No hit	No hit
OCU_RS26155	arabinosyltransferase	7	No	Hit	Hit	Hit	Hit	No hit	Hit	No hit	Hit	Hit
OCU_RS26175	arabinosyltransferase	8	No	Hit	Hit	Hit	Hit	Hit	Hit	No hit	Hit	Hit
OCU_RS26225	bacterial proteasome activator family protein	4	No	Hit	No hit	No hit	Hit	No hit	No hit	No hit	Hit	Hit
OCU_RS26815	hypothetical protein	2	No	No hit	No hit	No hit	Hit	No hit	No hit	No hit	Hit	No hit
OCU_RS26965	ArsA family ATPase	1	No	No hit	Hit	No hit	No hit	No hit	No hit	No hit	No hit	No hit
OCU_RS27055	ABC transporter permease	1	No	No hit	No hit	Hit	No hit	No hit	No hit	No hit	No hit	No hit
OCU_RS27170	hypothetical protein	2	No	No hit	No hit	No hit	No hit	No hit	Hit	No hit	Hit	No hit
OCU_RS27275	2-amino-4-hydroxy-6- hydroxymethyldihydropteridine diphosphokinase	1	No	No hit	No hit	No hit	Hit	No hit	No hit	No hit	No hit	No hit
OCU_RS27285	hypothetical protein	2	No	No hit	No hit	No hit	No hit	Hit	No hit	No hit	Hit	No hit
OCU_RS27290	DUF2520 domain-containing protein	1	No	No hit	No hit	No hit	No hit	Hit	No hit	No hit	No hit	No hit
OCU_RS27375	2-C-methyl-D-erythritol 4-phosphate cytidylyltransferase	7	No	Hit	Hit	Hit	Hit	No hit	No hit	Hit	Hit	Hit
OCU_RS27390	23S rRNA (guanosine(2251)-2'-O)-methyltransferase RlmB	8	No	Hit	Hit	Hit	Hit	Hit	Hit	No hit	Hit	Hit
OCU_RS27405	MBL fold metallo-hydrolase	1	No	No hit	No hit	Hit	No hit	No hit	No hit	No hit	No hit	No hit
OCU_RS27540	hypothetical protein	2	No	No hit	Hit	No hit	Hit	No hit	No hit	No hit	No hit	No hit
OCU_RS27545	hypothetical protein	4	No	No hit	Hit	Hit	Hit	No hit	Hit	No hit	No hit	No hit
OCU_RS27550	2-nitropropane dioxygenase	1	No	No hit	No hit	No hit	Hit	No hit	No hit	No hit	No hit	No hit
OCU_RS27575	SDR family NAD(P)-dependent oxidoreductase	1	No	No hit	No hit	No hit	No hit	Hit	No hit	No hit	No hit	No hit
OCU_RS27585	nitroreductase family deazaflavin-dependent oxidoreductase	1	No	No hit	No hit	No hit	No hit	Hit	No hit	No hit	No hit	No hit
OCU_RS27615	DNA-binding protein	1	No	No hit	No hit	No hit	Hit	No hit	No hit	No hit	No hit	No hit
OCU_RS28220	CPBP family intramembrane metalloprotease	2	No	No hit	Hit	No hit	Hit	No hit	No hit	No hit	No hit	No hit
OCU_RS28415	GntR family transcriptional regulator	6	No	Hit	Hit	Hit	Hit	No hit	Hit	No hit	Hit	No hit
OCU_RS28435	RND family transporter	1	No	Hit	No hit	No hit	No hit	No hit	No hit	No hit	No hit	No hit
OCU_RS28440	TetR/AcrR family transcriptional regulator	1	No	Hit	No hit	No hit	No hit	No hit	No hit	No hit	No hit	No hit
OCU_RS28510	LLM class F420-dependent oxidoreductase	2	No	No hit	No hit	No hit	Hit	Hit	No hit	No hit	No hit	No hit
OCU_RS28975	hypothetical protein	2	No	Hit	No hit	No hit	Hit	No hit	No hit	No hit	No hit	No hit
OCU_RS29680	hypothetical protein	2	Yes	No hit	Hit	No hit	No hit	No hit	No hit	No hit	Hit	No hit
OCU_RS29685	membrane protein	2	No	No hit	Hit	No hit	No hit	No hit	No hit	No hit	Hit	No hit
OCU_RS30130	ribose-phosphate diphosphokinase	1	No	No hit	No hit	No hit	No hit	Hit	No hit	No hit	No hit	No hit
OCU_RS30170	phosphopyruvate hydratase	8	No	Hit	Hit	Hit	Hit	No hit	Hit	Hit	Hit	Hit
OCU_RS30175	septum formation initiator family protein	6	No	No hit	Hit	Hit	No hit	No hit	Hit	Hit	Hit	Hit
OCU_RS30180	DUF501 domain-containing protein	6	No	No hit	Hit	Hit	No hit	No hit	Hit	Hit	Hit	Hit
OCU_RS30185	Ppx/GppA family phosphatase	4	No	No hit	No hit	No hit	No hit	No hit	Hit	Hit	Hit	Hit
OCU_RS30195	response regulator	1	No	No hit	No hit	No hit	Hit	No hit	No hit	No hit	No hit	No hit
OCU_RS30200	sensor histidine kinase KdpD	1	No	No hit	No hit	No hit	Hit	No hit	No hit	No hit	No hit	No hit
OCU_RS30230	response regulator transcription factor	2	No	Hit	No hit	No hit	No hit	No hit	No hit	No hit	Hit	No hit
OCU_RS30570	NAD-dependent epimerase/dehydratase family protein	1	No	No hit	No hit	No hit	No hit	No hit	No hit	No hit	Hit	No hit
OCU_RS30595	hypothetical protein	2	No	No hit	No hit	No hit	No hit	No hit	Hit	No hit	Hit	No hit
OCU_RS31005	type I polyketide synthase	3	No	No hit	Hit	No hit	Hit	No hit	No hit	No hit	Hit	No hit
OCU_RS31035	GAP family protein	1	No	No hit	No hit	No hit	No hit	No hit	Hit	No hit	No hit	No hit
OCU_RS31055	L-glutamate gamma-semialdehyde dehydrogenase	2	No	No hit	Hit	No hit	No hit	No hit	No hit	No hit	Hit	No hit
OCU_RS31125	2,3,4,5-tetrahydropyridine-2,6-dicarboxylate N-succinyltransferase	6	No	Hit	Hit	Hit	No hit	No hit	No hit	Hit	Hit	Hit
OCU_RS31355	TetR/AcrR family transcriptional regulator	2	No	No hit	No hit	No hit	Hit	Hit	No hit	No hit	No hit	No hit
OCU_RS31360	cytochrome P450	1	No	No hit	No hit	No hit	Hit	No hit	No hit	No hit	No hit	No hit
OCU_RS31810	SDR family oxidoreductase	2	No	No hit	No hit	Hit	Hit	No hit	No hit	No hit	No hit	No hit
OCU_RS31815	SDR family NAD(P)-dependent oxidoreductase	3	No	No hit	Hit	Hit	Hit	No hit	No hit	No hit	No hit	No hit
OCU_RS31960	long-chain fatty acid--CoA ligase	1	No	No hit	No hit	No hit	Hit	No hit	No hit	No hit	No hit	No hit
OCU_RS31965	crotonase/enoyl-CoA hydratase family protein	1	No	No hit	No hit	No hit	Hit	No hit	No hit	No hit	No hit	No hit
OCU_RS31980	acyl-CoA dehydrogenase	1	No	No hit	No hit	Hit	No hit	No hit	No hit	No hit	No hit	No hit
OCU_RS32195	SDR family oxidoreductase	2	No	Hit	No hit	Hit	No hit	No hit	No hit	No hit	No hit	No hit
OCU_RS32280	lipid-transfer protein	1	Yes	No hit	Hit	No hit	No hit	No hit	No hit	No hit	No hit	No hit
OCU_RS32285	hypothetical protein	1	No	No hit	Hit	No hit	No hit	No hit	No hit	No hit	No hit	No hit
OCU_RS33050	ABC transporter ATP-binding protein	3	No	No hit	No hit	Hit	Hit	No hit	Hit	No hit	No hit	No hit
OCU_RS33240	cytochrome P450	1	No	No hit	No hit	No hit	Hit	No hit	No hit	No hit	No hit	No hit
OCU_RS33450	hypothetical protein	1	No	No hit	No hit	Hit	No hit	No hit	No hit	No hit	No hit	No hit
OCU_RS33780	ATP-dependent Clp protease proteolytic subunit	6	No	Hit	Hit	Hit	No hit	No hit	Hit	No hit	Hit	Hit
OCU_RS33800	ATP-dependent Clp protease ATP-binding subunit ClpX	3	No	Hit	Hit	Hit	No hit	No hit	No hit	No hit	No hit	No hit
OCU_RS33865	50S ribosomal protein L27	3	No	No hit	No hit	No hit	Hit	No hit	Hit	No hit	No hit	Hit
OCU_RS33875	glutamate 5-kinase	6	No	Hit	No hit	Hit	Hit	No hit	Hit	No hit	Hit	Hit
OCU_RS34165	hypothetical protein	3	No	Hit	No hit	No hit	No hit	Hit	No hit	No hit	Hit	No hit
OCU_RS34170	SDR family NAD(P)-dependent oxidoreductase	2	No	Hit	No hit	No hit	No hit	No hit	No hit	No hit	Hit	No hit
OCU_RS34175	alpha/beta hydrolase	1	No	No hit	No hit	No hit	No hit	No hit	No hit	No hit	Hit	No hit
OCU_RS34195	class I SAM-dependent methyltransferase	3	No	Hit	No hit	Hit	Hit	No hit	No hit	No hit	No hit	No hit
OCU_RS34205	hypothetical protein	2	No	Hit	No hit	No hit	Hit	No hit	No hit	No hit	No hit	No hit
OCU_RS34210	cupin domain-containing protein	1	Yes	No hit	No hit	Hit	No hit	No hit	No hit	No hit	No hit	No hit
OCU_RS34275	hypothetical protein	3	No	No hit	No hit	Hit	No hit	Hit	No hit	No hit	Hit	No hit
OCU_RS34280	SDR family oxidoreductase	1	No	No hit	No hit	No hit	No hit	Hit	No hit	No hit	No hit	No hit
OCU_RS34360	acyl-CoA dehydrogenase family protein	1	No	No hit	No hit	No hit	Hit	No hit	No hit	No hit	No hit	No hit
OCU_RS34615	OsmC family peroxiredoxin	1	No	Hit	No hit	No hit	No hit	No hit	No hit	No hit	No hit	No hit
OCU_RS34620	NAD(P)H nitroreductase	1	No	Hit	No hit	No hit	No hit	No hit	No hit	No hit	No hit	No hit
OCU_RS34865	GTPase Era	1	No	No hit	No hit	No hit	No hit	No hit	No hit	No hit	Hit	No hit
OCU_RS34905	glycine--tRNA ligase	6	No	Hit	Hit	Hit	No hit	No hit	No hit	Hit	Hit	Hit
OCU_RS35120	site-specific integrase	1	No	Hit	No hit	No hit	No hit	No hit	No hit	No hit	No hit	No hit
OCU_RS35415	sulfurtransferase	1	No	No hit	No hit	No hit	No hit	Hit	No hit	No hit	No hit	No hit
OCU_RS35695	beta-ketoacyl-ACP synthase	2	No	Hit	No hit	No hit	No hit	No hit	No hit	No hit	Hit	No hit
OCU_RS35815	class I SAM-dependent methyltransferase	2	No	No hit	No hit	Hit	No hit	No hit	No hit	No hit	Hit	No hit
OCU_RS35940	SRPBCC family protein	1	No	No hit	No hit	No hit	Hit	No hit	No hit	No hit	No hit	No hit
OCU_RS35945	NAD(P)/FAD-dependent oxidoreductase	3	No	No hit	No hit	Hit	Hit	No hit	No hit	No hit	Hit	No hit
OCU_RS35955	glycine cleavage system aminomethyltransferase GcvT	4	Yes	No hit	Hit	Hit	Hit	No hit	Hit	No hit	No hit	No hit
OCU_RS35960	branched-chain amino acid aminotransferase	8	No	Hit	Hit	Hit	Hit	Hit	Hit	No hit	Hit	Hit
OCU_RS35965	adenosylcobinamide-GDP ribazoletransferase	2	No	No hit	No hit	No hit	Hit	No hit	No hit	No hit	Hit	No hit
OCU_RS35975	bifunctional adenosylcobinamide kinase/adenosylcobinamide-phosphate guanylyltransferase	1	No	No hit	No hit	No hit	Hit	No hit	No hit	No hit	No hit	No hit
OCU_RS36010	asparagine synthase (glutamine-hydrolyzing)	8	No	Hit	Hit	Hit	Hit	No hit	Hit	Hit	Hit	Hit
OCU_RS36045	c-type cytochrome	5	No	Hit	No hit	Hit	Hit	Hit	Hit	No hit	No hit	No hit
OCU_RS36050	heme-copper oxidase subunit III	2	No	No hit	No hit	Hit	Hit	No hit	No hit	No hit	No hit	No hit
OCU_RS36170	16S rRNA (cytosine(1402)-N(4))-methyltransferaseRsmH	2	No	No hit	No hit	No hit	Hit	No hit	No hit	No hit	Hit	No hit
OCU_RS36175	hypothetical protein	6	No	No hit	Hit	Hit	Hit	No hit	Hit	No hit	Hit	Hit
OCU_RS36430	hypothetical protein	5	No	Hit	Hit	Hit	Hit	No hit	No hit	No hit	No hit	Hit
OCU_RS36595	phosphoribosyl-ATP diphosphatase	8	No	Hit	Hit	Hit	Hit	Hit	Hit	Hit	Hit	No hit
OCU_RS36600	ATP phosphoribosyltransferase	8	No	Hit	Hit	Hit	Hit	Hit	Hit	Hit	Hit	No hit
OCU_RS36820	polyprenol monophosphomannose synthase	5	No	Hit	Hit	Hit	No hit	No hit	Hit	No hit	Hit	No hit
OCU_RS37975	undecaprenyl-diphosphate phosphatase	1	Yes	No hit	No hit	No hit	No hit	No hit	No hit	No hit	Hit	No hit
OCU_RS38275	type VII secretion-associated serine protease mycosin	3	Yes	No hit	Hit	No hit	No hit	Hit	Hit	No hit	No hit	No hit
OCU_RS38280	type VII secretion integral membrane protein EccD	2	Yes	No hit	No hit	No hit	No hit	Hit	Hit	No hit	No hit	No hit
OCU_RS39060	ribosome biogenesis GTPase Der	5	No	Hit	Hit	Hit	No hit	No hit	Hit	Hit	No hit	No hit
OCU_RS39125	NAD kinase	5	No	No hit	No hit	Hit	No hit	Hit	Hit	Hit	No hit	Hit
OCU_RS39205	GMC family oxidoreductase	1	No	No hit	No hit	No hit	Hit	No hit	No hit	No hit	No hit	No hit
OCU_RS39275	arginine repressor	3	No	No hit	No hit	Hit	No hit	Hit	No hit	No hit	Hit	No hit
OCU_RS39290	acetylglutamate kinase	7	No	Hit	Hit	Hit	No hit	No hit	Hit	Hit	Hit	Hit
OCU_RS39345	translation initiation factor IF-3	2	No	No hit	No hit	Hit	No hit	No hit	No hit	No hit	Hit	No hit
OCU_RS39350	bifunctional lysylphosphatidylglycerol synthetase/lysine--tRNA ligase LysX	3	No	Hit	Hit	No hit	No hit	No hit	No hit	No hit	Hit	No hit
OCU_RS39540	cytochrome d ubiquinol oxidase subunit II	1	No	No hit	No hit	No hit	No hit	No hit	No hit	No hit	Hit	No hit
OCU_RS39600	TIGR02234 family membrane protein	7	No	Hit	Hit	Hit	Hit	Hit	Hit	No hit	No hit	Hit
OCU_RS39630	inositol monophosphatase family protein	1	No	No hit	No hit	Hit	No hit	No hit	No hit	No hit	No hit	No hit
OCU_RS39640	imidazole glycerol phosphate synthase subunit HisH	7	No	Hit	Hit	Hit	No hit	Hit	Hit	No hit	Hit	Hit
OCU_RS39750	8-amino-7-oxononanoate synthase	1	No	No hit	No hit	No hit	Hit	No hit	No hit	No hit	No hit	No hit
OCU_RS39780	malto-oligosyltrehalose synthase	1	No	No hit	No hit	No hit	Hit	No hit	No hit	No hit	No hit	No hit
OCU_RS39955	ABC transporter	1	No	Hit	No hit	No hit	No hit	No hit	No hit	No hit	No hit	No hit
OCU_RS39960	hypothetical protein	1	No	Hit	No hit	No hit	No hit	No hit	No hit	No hit	No hit	No hit
OCU_RS40040	glycosyltransferase	2	No	No hit	No hit	Hit	No hit	No hit	No hit	No hit	Hit	No hit
OCU_RS40415	triose-phosphate isomerase	5	No	Hit	No hit	Hit	Hit	No hit	No hit	No hit	Hit	Hit
OCU_RS40420	phosphoglycerate kinase	8	No	Hit	Hit	Hit	Hit	Hit	Hit	No hit	Hit	Hit
OCU_RS40425	type I glyceraldehyde-3-phosphate dehydrogenase	8	No	Hit	Hit	Hit	Hit	Hit	Hit	No hit	Hit	Hit
OCU_RS40545	MFS transporter	2	No	No hit	Hit	No hit	No hit	No hit	No hit	No hit	Hit	No hit
OCU_RS40550	bifunctional diaminohydroxyphosphoribosylaminopyrimidine deaminase/5-amino-6-(5-phosphoribosylamino)uracil reductase RibD	8	No	Hit	Hit	Hit	Hit	Hit	Hit	No hit	Hit	Hit
OCU_RS40555	ribulose-phosphate 3-epimerase	5	No	No hit	Hit	Hit	Hit	Hit	No hit	No hit	Hit	No hit
OCU_RS40560	rRNA small subunit methyltransferase B	3	Yes	No hit	No hit	No hit	No hit	Hit	Hit	No hit	Hit	No hit
OCU_RS40565	methionyl-tRNA formyltransferase	3	No	No hit	No hit	No hit	No hit	Hit	Hit	No hit	Hit	No hit
OCU_RS40615	DNA-directed RNA polymerase subunit omega	3	No	No hit	Hit	Hit	No hit	No hit	Hit	No hit	No hit	No hit
OCU_RS40720	transcription antitermination factor NusB	1	No	No hit	No hit	No hit	No hit	No hit	Hit	No hit	No hit	No hit
OCU_RS40740	type II 3-dehydroquinate dehydratase	8	No	Hit	Hit	Hit	Hit	Hit	No hit	Hit	Hit	Hit
OCU_RS40765	prepilin peptidase	1	No	No hit	No hit	No hit	No hit	No hit	No hit	No hit	Hit	No hit
OCU_RS40925	histidine--tRNA ligase	8	No	Hit	Hit	Hit	Hit	Hit	Hit	No hit	Hit	Hit
OCU_RS40935	peptidylprolyl isomerase	4	No	Hit	Hit	Hit	No hit	No hit	No hit	No hit	No hit	Hit
OCU_RS40940	RelA/SpoT family protein	1	No	Hit	No hit	No hit	No hit	No hit	No hit	No hit	No hit	No hit
OCU_RS40955	protein translocase subunit SecF	6	No	Hit	Hit	Hit	Hit	No hit	No hit	No hit	Hit	Hit
OCU_RS41055	NUDIX domain-containing protein	1	No	No hit	No hit	No hit	No hit	Hit	No hit	No hit	No hit	No hit
OCU_RS41065	phosphatidylinositol mannoside acyltransferase	7	No	Hit	Hit	Hit	Hit	Hit	No hit	Hit	Hit	No hit
OCU_RS41070	CDP-alcohol phosphatidyltransferase family protein	5	No	Hit	Hit	Hit	No hit	Hit	No hit	No hit	Hit	No hit
OCU_RS41075	HIT domain-containing protein	2	No	No hit	Hit	No hit	No hit	Hit	No hit	No hit	No hit	No hit
OCU_RS41525	1-deoxy-D-xylulose-5-phosphate synthase	8	No	Hit	Hit	Hit	No hit	Hit	Hit	Hit	Hit	Hit
OCU_RS41850	ribonuclease J	1	No	No hit	No hit	No hit	No hit	No hit	No hit	No hit	Hit	No hit
OCU_RS41855	4-hydroxy-tetrahydrodipicolinate synthase	5	No	Hit	No hit	Hit	No hit	No hit	Hit	Hit	Hit	No hit
OCU_RS41880	thymidylate synthase	7	No	Hit	No hit	Hit	Hit	Hit	Hit	No hit	Hit	Hit
OCU_RS42085	MATE family efflux transporter	1	No	No hit	No hit	No hit	No hit	No hit	No hit	No hit	Hit	No hit
OCU_RS42150	cob(I)yrinic acid a,c-diamide adenosyltransferase	2	No	No hit	No hit	Hit	Hit	No hit	No hit	No hit	No hit	No hit
OCU_RS42185	hydrogenase maturation protease	1	No	No hit	No hit	No hit	No hit	Hit	No hit	No hit	No hit	No hit
OCU_RS42190	hypothetical protein	1	Yes	No hit	No hit	No hit	No hit	Hit	No hit	No hit	No hit	No hit
OCU_RS42385	30S ribosomal protein S2	8	No	Hit	Hit	Hit	Hit	No hit	Hit	Hit	Hit	Hit
OCU_RS42590	ribonuclease III	4	No	No hit	Hit	Hit	No hit	No hit	Hit	Hit	No hit	No hit
OCU_RS42825	acetolactate synthase small subunit	2	No	No hit	No hit	No hit	Hit	Hit	No hit	No hit	No hit	No hit
OCU_RS42955	cysteine desulfurase	1	No	No hit	No hit	No hit	No hit	No hit	Hit	No hit	No hit	No hit
OCU_RS42970	electron transfer flavoprotein subunit alpha/FixB family protein	2	No	No hit	Hit	No hit	No hit	No hit	Hit	No hit	No hit	No hit
OCU_RS43045	methyltransferase domain-containing protein	1	No	No hit	No hit	No hit	Hit	No hit	No hit	No hit	No hit	No hit
OCU_RS43050	FAD-dependent oxidoreductase	1	No	No hit	No hit	No hit	Hit	No hit	No hit	No hit	No hit	No hit
OCU_RS43695	SsrA-binding protein SmpB	4	No	Hit	Hit	No hit	No hit	Hit	No hit	No hit	Hit	No hit
OCU_RS43720	peptide chain release factor 2	7	No	Hit	Hit	Hit	Hit	No hit	Hit	No hit	Hit	Hit
OCU_RS43875	NADH-quinone oxidoreductase subunit G	1	No	No hit	No hit	Hit	No hit	No hit	No hit	No hit	No hit	No hit
OCU_RS43890	NADH-quinone oxidoreductase subunit J	1	Yes	No hit	No hit	Hit	No hit	No hit	No hit	No hit	No hit	No hit
OCU_RS43895	NADH-quinone oxidoreductase subunit NuoK	1	No	No hit	No hit	Hit	No hit	No hit	No hit	No hit	No hit	No hit
OCU_RS43960	flavin monoamine oxidase family protein	1	No	No hit	No hit	No hit	Hit	No hit	No hit	No hit	No hit	No hit
OCU_RS43965	alpha/beta hydrolase	2	No	No hit	No hit	Hit	Hit	No hit	No hit	No hit	No hit	No hit
OCU_RS44155	response regulator transcription factor	1	No	No hit	No hit	No hit	Hit	No hit	No hit	No hit	No hit	No hit
OCU_RS44385	ATP-dependent DNA helicase UvrD2	6	No	Hit	Hit	Hit	Hit	No hit	No hit	No hit	Hit	Hit
OCU_RS44700	dTMP kinase	6	No	No hit	Hit	Hit	No hit	Hit	Hit	Hit	No hit	Hit
OCU_RS44735	mannose-6-phosphate isomerase, class I	5	No	Hit	Hit	Hit	No hit	No hit	Hit	No hit	No hit	Hit
OCU_RS44750	DUF3499 domain-containing protein	1	No	No hit	No hit	No hit	Hit	No hit	No hit	No hit	No hit	No hit
OCU_RS44765	2-phospho-L-lactate transferase	1	No	No hit	No hit	No hit	No hit	No hit	Hit	No hit	No hit	No hit
OCU_RS44770	coenzyme F420-0:L-glutamate ligase	1	Yes	No hit	No hit	No hit	No hit	No hit	Hit	No hit	No hit	No hit
OCU_RS44785	NDP-sugar synthase	5	No	No hit	No hit	Hit	Hit	Hit	Hit	No hit	Hit	No hit
OCU_RS45065	glycerol-3-phosphate dehydrogenase/oxidase	3	No	No hit	Hit	Hit	No hit	No hit	No hit	No hit	Hit	No hit
OCU_RS45215	MFS transporter	2	No	No hit	No hit	Hit	No hit	No hit	No hit	No hit	Hit	No hit
OCU_RS45220	N-acetylglucosamine-6-phosphate deacetylase	3	No	No hit	No hit	Hit	Hit	No hit	No hit	No hit	Hit	No hit
OCU_RS45255	bifunctional o-acetylhomoserine/o-acetylserine sulfhydrylase	8	No	Hit	Hit	Hit	Hit	Hit	Hit	No hit	Hit	Hit
OCU_RS45260	homoserine O-acetyltransferase	8	No	Hit	Hit	No hit	Hit	Hit	Hit	Hit	Hit	Hit
OCU_RS45265	class I SAM-dependent methyltransferase	2	Yes	No hit	No hit	No hit	No hit	Hit	No hit	No hit	Hit	No hit
OCU_RS45285	DUF3017 domain-containing protein	6	No	Hit	Hit	No hit	No hit	Hit	Hit	No hit	Hit	Hit
OCU_RS45365	trehalose-phosphatase	1	No	No hit	No hit	No hit	No hit	No hit	No hit	No hit	No hit	Hit
OCU_RS45425	glutamine-hydrolyzing GMP synthase	5	No	Hit	Hit	Hit	No hit	No hit	Hit	No hit	Hit	No hit
OCU_RS45545	tRNA (adenosine(37)-N6)-threonylcarbamoyltransferase complex transferase subunit TsaD	2	No	No hit	No hit	No hit	No hit	Hit	Hit	No hit	No hit	No hit
OCU_RS45655	type VII secretion-associated protein	4	No	No hit	No hit	Hit	Hit	No hit	Hit	No hit	Hit	No hit
OCU_RS45660	type VII secretion protein EccCb	1	No	No hit	No hit	No hit	Hit	No hit	No hit	No hit	No hit	No hit
OCU_RS45665	type VII secretion integral membrane protein EccD	1	No	No hit	No hit	No hit	Hit	No hit	No hit	No hit	No hit	No hit
OCU_RS45705	30S ribosomal protein S4	8	No	Hit	Hit	Hit	No hit	Hit	Hit	Hit	Hit	Hit
OCU_RS45715	30S ribosomal protein S13	1	No	No hit	No hit	No hit	No hit	No hit	No hit	Hit	No hit	No hit
OCU_RS45750	dTDP-4-dehydrorhamnose 3,5-epimerase	7	No	Hit	Hit	Hit	Hit	Hit	Hit	No hit	Hit	No hit
OCU_RS45760	acyltransferase	6	No	Hit	Hit	Hit	No hit	No hit	No hit	Hit	Hit	Hit
OCU_RS45995	50S ribosomal protein L24	4	No	Hit	No hit	No hit	Hit	No hit	No hit	No hit	Hit	Hit
OCU_RS46360	50S ribosomal protein L33	1	No	No hit	No hit	No hit	No hit	No hit	No hit	No hit	Hit	No hit
OCU_RS46430	exodeoxyribonuclease V subunit gamma	1	No	No hit	No hit	No hit	Hit	No hit	No hit	No hit	No hit	No hit
OCU_RS46585	polyprenyl synthetase family protein	3	No	Hit	Hit	Hit	No hit	No hit	No hit	No hit	No hit	No hit
OCU_RS46610	glycosyltransferase family 1 protein	1	No	No hit	No hit	No hit	No hit	Hit	No hit	No hit	No hit	No hit
OCU_RS46670	nitroreductase family deazaflavin-dependent oxidoreductase	1	No	No hit	No hit	No hit	No hit	No hit	Hit	No hit	No hit	No hit
OCU_RS46710	hypothetical protein	1	No	No hit	No hit	No hit	No hit	No hit	No hit	No hit	No hit	Hit
OCU_RS46750	1,4-dihydroxy-2-naphthoate polyprenyltransferase	2	No	No hit	No hit	Hit	No hit	No hit	No hit	No hit	No hit	Hit
OCU_RS46770	c-type cytochrome biogenesis protein CcsB	1	No	No hit	No hit	Hit	No hit	No hit	No hit	No hit	No hit	No hit
OCU_RS46785	TlpA family protein disulfide reductase	2	No	No hit	No hit	Hit	No hit	No hit	Hit	No hit	No hit	No hit
OCU_RS46890	glutamyl-tRNA reductase	7	No	Hit	Hit	Hit	No hit	No hit	Hit	Hit	Hit	Hit
OCU_RS47230	chaperonin GroEL	7	No	Hit	Hit	Hit	No hit	No hit	Hit	Hit	Hit	Hit
OCU_RS47275	CDP-diacylglycerol--serine O-phosphatidyltransferase	1	No	No hit	No hit	No hit	Hit	No hit	No hit	No hit	No hit	No hit
OCU_RS47290	hypothetical protein	4	No	No hit	No hit	Hit	Hit	No hit	Hit	Hit	No hit	No hit
OCU_RS47345	peptide deformylase	3	No	No hit	No hit	Hit	No hit	Hit	Hit	No hit	No hit	No hit
OCU_RS47350	hypothetical protein	2	No	No hit	No hit	Hit	No hit	Hit	No hit	No hit	No hit	No hit
OCU_RS47395	MarR family transcriptional regulator	3	No	No hit	Hit	No hit	Hit	No hit	Hit	No hit	No hit	No hit
OCU_RS47400	LLM class F420-dependent oxidoreductase	1	No	No hit	No hit	No hit	Hit	No hit	No hit	No hit	No hit	No hit
OCU_RS47490	glycine oxidase ThiO	3	No	No hit	Hit	Hit	No hit	Hit	No hit	No hit	No hit	No hit
OCU_RS47740	nucleotide exchange factor GrpE	3	No	No hit	Hit	No hit	No hit	Hit	No hit	No hit	Hit	No hit
OCU_RS47745	molecular chaperone DnaK	7	No	Hit	Hit	Hit	No hit	Hit	Hit	No hit	Hit	Hit
OCU_RS47875	integrase	1	No	Hit	No hit	No hit	No hit	No hit	No hit	No hit	No hit	No hit
OCU_RS48105	type VII secretion protein EccE	8	No	Hit	Hit	No hit	Hit	Hit	Hit	Hit	Hit	Hit
OCU_RS48125	WXG100 family type VII secretion target	7	No	Hit	Hit	No hit	Hit	Hit	No hit	Hit	Hit	Hit
OCU_RS48130	type VII secretion system protein EsxS	6	No	Hit	No hit	No hit	Hit	Hit	No hit	Hit	Hit	Hit
OCU_RS48140	PE family protein	6	No	No hit	Hit	No hit	Hit	Hit	Hit	Hit	No hit	Hit
OCU_RS48155	type VII secretion system ESX-3 AAA family ATPase EccA3	8	No	Hit	Hit	No hit	Hit	Hit	Hit	Hit	Hit	Hit
OCU_RS48615	alpha/beta hydrolase	1	No	No hit	No hit	No hit	Hit	No hit	No hit	No hit	No hit	No hit
OCU_RS48620	amidohydrolase	1	No	No hit	No hit	No hit	Hit	No hit	No hit	No hit	No hit	No hit
OCU_RS48660	phosphoenolpyruvate carboxykinase (GTP)	5	Yes	No hit	Hit	No hit	No hit	Hit	Hit	Hit	Hit	No hit
OCU_RS48685	membrane protein	8	No	Hit	Hit	Hit	No hit	Hit	Hit	Hit	Hit	Hit
OCU_RS48755	dihydroxy-acid dehydratase	7	No	Hit	Hit	Hit	No hit	No hit	Hit	Hit	Hit	Hit
OCU_RS48830	DUF1275 domain-containing protein	1	No	No hit	Hit	No hit	No hit	No hit	No hit	No hit	No hit	No hit
OCU_RS48835	hypothetical protein	1	Yes	No hit	Hit	No hit	No hit	No hit	No hit	No hit	No hit	No hit
OCU_RS49685	CoA transferase	1	No	No hit	No hit	Hit	No hit	No hit	No hit	No hit	No hit	No hit
OCU_RS49870	hypothetical protein	1	No	Hit	No hit	No hit	No hit	No hit	No hit	No hit	No hit	No hit
OCU_RS49875	hypothetical protein	2	No	Hit	No hit	Hit	No hit	No hit	No hit	No hit	No hit	No hit
OCU_RS50115	DNA-binding protein	2	No	No hit	Hit	No hit	No hit	No hit	No hit	No hit	Hit	No hit
OCU_RS50120	NUDIX hydrolase	2	No	Hit	No hit	Hit	No hit	No hit	No hit	No hit	No hit	No hit
OCU_RS50125	hypothetical protein	1	No	Hit	No hit	No hit	No hit	No hit	No hit	No hit	No hit	No hit
OCU_RS50535	MbtH family protein	1	No	No hit	No hit	No hit	No hit	No hit	No hit	No hit	Hit	No hit
